# Supplementary material for: Applications of a Rapid and Sensitive Dengue DUO Rapid Immunochromatographic Test Kit as a Diagnostic Strategy during a Dengue Type 2 Epidemic in an Urban City
Source: PLoS One. 2016 Jul 14;11(7):e0158437. doi: 10.1371/journal.pone.0158437 (PMC4945082; doi:10.1371/journal.pone.0158437)
Supplement: S1 Raw Data — (XLSX) [file pone.0158437.s001.xlsx]

## Sheet: Sheet
Sex	Age	Degree	T	R	SBP	DBP	P	Code1	Code2	Code3	Code4	Stay	Depos	fdays	NS1	Igm	Igg	logviremia
M	74	3	39.2	18	128	68	78	7806	061	7806	061	2.8	MBD	3	Positive	Negative	Negative
M	61	3	39.8	24	126	71	104	486	486	7806	486	47.13	Transfer	2	Positive	Negative	Negative
F	77	3	39.3	20	153	70	109	78609	78609	25000	4019	3.73	MBD	1	Positive	Negative	Negative	5
F	46	4	36.6	20	159	95	100	061				3.38	MBD	2	Positive	Positive	Negative
F	75	3	38.6	22	177	93	120	9351	7806	7806	78009	19.15	Admission	1	Positive	Negative	Negative
F	74	4	37.8	18	155	74	80	78900	78900	5770	78900	1.65	MBD	2	Positive	Negative	Negative
F	58	4	37.8	18	145	99	80	061	7806			5.7	MBD	3	Positive	Negative	Negative
F	82	3	35.8	20	101	62	81	95901	920	9213	87342	4.55	Admission	0	Positive	Negative	Negative
M	27	3	39.8	20	146	72	120	78039	78039	6829	3449	39.35	AAD	1	Positive
F	56	3	37.6	20	163	114	104	061				1.63	MBD	4
F	30	3	38.8	20	122	75	132	061	7806	061	7806	3.3	MBD	2	Positive	Negative	Negative
M	42	3	38.9	20	118	70	108	7089	061	7806	061	11.15	Transfer	1	Positive	Negative	Negative	6
F	59	4	36.7	20	121	65	86	7806	061	7806	061	4.62	MBD	7
M	68	2	39.4	18	153	92	86	9229	1541	9229	78900	6.83	MBD	1
F	49	3	38.2	20	145	93	122	7806	061			2.33	MBD	1	Positive	Negative	Negative	7
M	82	3	38.6	20	120	83	93	7806	25000	4019	7806	28.7	Admission	1
F	59	3	39	18	157	90	122	8449	82380	8449	82380	3.3	MBD	1	Positive	Negative	Negative
M	95	3	37.2	18	106	69	65	7802	4019	95901	95901	21.95	MBD	5	Positive	Negative	Positive
F	79	4	36.8	24	165	91	79	4660	38619	4019	4660	8.52	MBD	0	Positive	Positive	Positive
M	56	3	38.8	20	115	75	90	7804	5589	193	5589	2.68	MBD	2	Negative	Negative	Negative
M	66	3	38.5	19	145	91	86	585	7804	585	7804	3.38	MBD	1	Positive	Negative	Negative
M	74	2	37	24	179	141	153	585	78052	585	78052	3.97	MBD	1	Positive	Negative	Positive
F	83	1	40.7	20	147	70	112	7804	25000	78609	78609	38.9	Admission	1	Positive	Negative	Negative
F	53	3	39	20	124	67	100	7806	061	4019	061	2.45	MBD	2	Positive	Negative	Negative	5
F	49	3	38	20	117	82	95	061	061	53081	061	8.9	MBD	1
M	80	2	38.2	20	142	86	152	4279	7806	41401	061	5.62	Admission	1	Positive	Negative	Negative
M	64	3	38.9	20	163	94	89	95901	95901	8730	95901	4.55	MBD	1	Positive	Negative	Negative	7
F	71	2	37.5	20	125	84	69	78650	78650	061	061	5.78	MBD	0	Positive	Negative	Negative	4
F	83	3	39.1	20	149	108	89	7806	061	41401	061	2.1	MBD	1	Positive	Negative	Negative
M	79	3	38.4	20	142	77	84	7806	57420	061	7806	4.4	MBD	2	Positive	Negative	Negative	6
F	87	3	39.9	22	141	72	102	95901	87340	7806	4019	10.98	Admission	2	Positive	Negative	Negative	8
F	56	3	37.8	20	184	89	74	7806	78900	061	061	2.2	MBD	6	Positive	Positive	Negative	3
M	39	3	38.9	24	128	83	117	061				2.32	MBD	2	Positive	Negative	Negative
F	76	3	38.8	20	137	69	93	061	7806	95901	920	5.2	MBD	1	Positive	Negative	Negative	5
F	57	3	38.4	20	129	79	95	7840	7840	38022	7840	1.75	MBD	2	Positive	Negative	Negative
F	52	3	39.4	20	137	76	134	92420	92420	8920	061	2.07	MBD	1	Positive	Negative	Negative
M	62	3	37.6	20	139	91	114	7806	061	7806	061	2.4	MBD	2	Positive	Negative	Positive
M	82	3	38.8	20	162	71	82	43401	4019	43401	7804	2.02	MBD	1	Positive	Negative	Negative
F	84	3	37.8	20	126	88	94	5750	4019	7806	5750	20.82	MBD	7	Negative	Negative	Positive
F	63	3	38.7	20	171	99	131	061	7806	061	7806	4.7	MBD	1	Positive	Negative	Negative
F	83	3	37.2	18	125	63	69	061	7806	061	7806	4.08	MBD	1	Positive	Negative	Negative	3
F	63	3	37.1	18	121	80	95	5990	7806	061	5990	7.2	MBD	3	Positive	Positive	Negative	4
F	83	3	40.1	18	172	77	136	25020	25000	4019	25020	31.38	Admission	1	Negative	Negative	Positive
F	69	3	38.3	22	151	83	91	78900	78900	7806	7824	4.57	MBD	1	Negative	Negative	Negative	1
F	77	3	38.5	20	139	69	74	92231	6829	8760	8760	36.05	MBD	2	Positive	Negative	Negative	5
M	53	3	37.3	18	103	71	75	8470	95901	7806	061	43.05	Admission	3
M	48	3	39.3	20	111	76	110	7806	7806	7806	49390	3.3	MBD	1	Positive	Negative	Negative
F	70	3	38.9	18	191	112	93	78900	5589	41401	4019	24.53	MBD	1	Positive	Negative	Negative	8
M	80	3	39.8	20	190	89	111	53190	53190	486	53190	3.62	MBD	1	Positive	Negative	Negative	5
F	73	3	39.2	20	123	70	116	5400	7806	061	7806	2.9	MBD	2	Positive	Negative	Negative	8
M	72	3	39.2	19	155	75	94	7806	061	061	7806	2.17	MBD	1	Positive	Negative	Negative	6
F	77	3	36.1	20	122	68	80	061	78650	41401	4019	6.57	MBD	0	Positive	Positive	Positive
F	94	3	38.3	18	127	67	92	7806	7806	5990	7806	3.97	MBD	1	Negative	Positive	Negative
M	29	3	38.8	20	126	87	120	7806	7806	061	061	2.5	MBD	1	Positive	Negative	Negative
F	55	3	39.7	18	141	74	109	7806	061	7806		2.92	MBD	1	Positive	Positive	Negative
M	46	3	37.8	20	121	80	110	7806	7806	5715	07032	20.2	MBD	2
M	51	3	37.3	20	136	91	81	7880	7806	7806	061	2.55	MBD	4	Positive	Negative	Negative
M	79	3	37	20	110	54	60	4389	25000	4019	4389	4.63	Admission	0	Positive	Positive	Positive
F	62	3	37.9	20	140	89	108	7806	061	7806	061	3.42	MBD	1	Positive	Negative	Negative	5
M	58	2	37.2	20	109	78	153	4279	7806	4279	7806	4.68	Admission	0	Positive	Negative	Negative
M	60	3	36.3	20	114	85	126	5715	5839	25000	78900	41.05	MBD	0
F	66	3	37.8	20	118	79	84	9221	8830	87364	4019	3.92	MBD	5	Positive	Positive	Negative
F	60	3	38.9	20	108	68	73	7806	7806	061	061	2.32	MBD	2	Positive	Negative	Negative	7
F	62	4	36.6	20	132	76	98	0092	1532	0092	0092	18.25	MBD	1	Positive	Positive	Negative
M	60	3	39.1	20	160	107	105	7806	4019	061	7806	2.07	MBD	1	Positive	Negative	Negative
F	79	3	38.9	20	118	57	105	7806	25000	4389	486	1.93	MBD	2	Positive	Negative	Negative
F	64	3	38.6	19	151	85	108	061	7806	4019	061	4.12	MBD	1	Positive	Negative	Negative
F	73	3	37.4	20	157	93	94	061	061	5733	4019	19.98	MBD	0	Positive	Positive	Positive
M	88	3	39.5	20	142	75	81	7806	061	7806	7806	7.03	Admission	1	Negative	Negative	Negative
F	72	3	38.8	18	129	70	96	7806	061	25000	4019	6.25	MBD	2
F	67	3	39.1	20	139	83	107	7806	25000	4019	061	25.73	MBD	1
F	68	3	39.6	20	171	101	119	7806	7806	7806	7804	4.8	MBD	1	Positive	Negative	Negative
M	75	3	36.5	20	149	77	64	434	434	25000	4019	73.47	MBD	3	Positive	Negative	Positive
F	59	3	39.3	20	126	82	117	6829	6829	4019	6829	2.1	MBD	1	Positive
M	56	3	38.7	24	176	106	117	4019	4019	43401	25000	10.35	MBD	1	Positive	Negative	Negative
M	65	3	36	20	110	71	54	061	V427	061		4.28	MBD	0	Positive	Positive	Negative	5
M	28	4	38.2	16	147	111	89	061	061			2.5	MBD	3	Positive	Positive	Negative
M	91	3	37.6	20	123	63	76	92231	7806	061	4019	3.78	MBD	1	Positive	Negative	Negative	8
F	69	3	38.5	20	149	76	100	38619	7806	7806	061	2.38	MBD	2	Positive	Negative	Negative
M	86	3	39.3	20	140	59	88	5997	7806	5990	7806	16.95	Transfer	1	Positive	Negative	Negative	6
F	51	3	39.8	20	148	73	102	7806	4659	061	7806	2.13	MBD	1	Positive	Negative	Negative	6
F	85	3	38.6	20	140	81	88	7806	25000	061	7806	8.48	MBD	3	Positive	Negative	Negative
M	63	3	39.6	20	151	78	87	061	7806	061	7806	2.87	MBD	2	Positive	Negative	Negative
F	55	3	37.1	20	156	82	107	061	4659			2.88	MBD	1	Negative	Negative	Negative
M	63	3	36.8	18	150	89	64	061	7806	5789	5715	30.43	Admission	4	Positive	Negative	Negative
F	78	3	37.7	20	113	73	89	7806	0092	4019	7806	13.95	MBD	3	Positive	Positive	Negative	3
F	82	3	38.7	20	173	68	96	78609	78609	2859	78609	2.85	MBD	1	Positive	Negative	Negative	5
F	45	2	38.2	22	112	72	75	061	061	061	2875	1.77	MBD	1
M	76	2	36.8	24	181	118	74	43401	431	78609	486	74.2	MBD	0	Positive	Positive	Positive
F	57	3	39.4	18	128	79	119	7806	061	7806	061	2.07	MBD	1	Positive	Negative	Negative
F	76	3	37.8	16	136	94	93	7804	4019	38619	7806	4.87	MBD	0	Positive	Negative	Negative
M	87	3	39.1	20	154	79	86	7806	4019	7806	4019	3.52	MBD	1
F	55	3	38.5	18	125	69	123	7806	7806	061	7806	1.9	MBD	1	Positive	Negative	Negative
F	86	3	37.4	20	119	47	54	7806	061	7806		3.08	MBD	3	Negative	Negative	Negative
F	83	3	36.8	18	184	90	91	78701	7806	78701	7806	30.05	MBD	0	Positive	Positive	Positive
M	79	4	36.8	20	170	94	97	061	061	061		2.38	MBD	7	Positive	Positive	Positive
F	48	3	39	18	118	79	89	061	7806	061	7806	12.42	Admission	1	Positive	Negative	Negative	8
M	89	3	39.4	18	145	58	60	061	7806	4019		2.92	MBD	1	Positive	Negative	Negative
F	51	3	36.4	20	99	73	103	37000	7806	78701	7821	17.55	MBD	7	Positive	Positive	Negative
M	54	1	36.5	20	99	73	103	2512	585	4019	2512	1.72	Admission	0
M	40	3	39	24	129	71	116	9233	9233	81600	9233	4.07	MBD	2	Positive	Negative	Negative
M	26	3	39.7	24	122	96	113	061	7806	061	7806	4.4	MBD	2	Positive	Negative	Negative
M	48	3	38.1	18	148	97	103	7806	061	061	7806	3.07	MBD	1	Positive	Negative	Negative	6
F	90	3	37.5	22	125	69	69	7863	4019	7863	2859	30.52	MBD	0
M	42	3	39.1	20	154	95	130	7242	5920	5921	5920	4.02	Transfer	1	Negative	Negative	Negative
F	91	3	37	22	144	71	102	7806	25000	4019	7806	20.53	Admission	1	Negative	Negative	Negative
F	65	3	37.8	20	184	110	122	7802	5789	5789	5789	17.42	MBD	0	Negative	Negative	Negative
F	63	1	41.1	20	171	123	97	6829	9233	78900	78900	2.78	Transfer	1
M	75	3	39.7	20	206	98	115	92411	71106	5789	1450	21.15	MBD	1	Positive	Negative	Negative
F	26	3	38	20	115	71	93	64410	64003	6238	78900	2.55	MBD	1
M	34	3	38.1	20	115	74	112	7806	7806	061	061	2.23	MBD	1	Positive	Negative	Negative
F	80	3	37.6	20	106	70	82	1519	5640	1519	7806	2.13	MBD	2	Positive	Negative	Negative
M	71	3	39.3	18	154	81	92	7806	7806	4019	7806	2.25	MBD	1	Positive	Negative	Negative
M	58	3	39.5	20	149	104	94	061	41401	4019	061	2.4	MBD	4	Positive	Positive	Positive
F	76	1	37.1	18	86	52	60	78550	2765	061	78550	22.22	Admission	0	Positive	Positive	Positive
M	61	3	38.6	16	155	93	98	061	7806	061	7806	2.4	MBD	2	Positive	Negative	Negative
F	63	3	38	20	140	91	95	7806	061	5589	7806	2.32	MBD	1	Positive	Negative	Negative
M	55	3	38.8	20	125	83	89	7806	7806	061	7806	4.33	MBD	7	Positive	Positive	Negative	7
F	50	3	37.3	20	122	85	78	7806	061	7806		1.8	MBD	5	Positive	Positive	Negative	4
M	87	3	37	22	103	58	109	99673	585	99673	99673	34.68	Admission	1	Negative	Negative	Negative
M	83	3	39.4	20	155	103	102	061	7806	4019	061	3.25	MBD	1	Positive	Negative	Negative
M	55	3	37.5	20	134	92	105	2875	7806	2875	7806	10.63	Transfer	5	Positive	Positive	Positive
M	38	4	37.7	18	135	98	89	061	061			1.93	MBD	6	Positive	Positive	Positive
M	56	4	37.7	18	126	76	102	6829	6829	0539	7806	2.15	MBD	2	Positive	Negative	Negative	7
M	55	4	37.7	18	126	76	102	7806	7806	7806	061	2.38	MBD	2	Positive	Positive	Positive
F	48	3	36.4	18	118	75	78	7806	78701	061	061	4.33	MBD	5	Negative	Negative	Positive
M	51	4	37.5	20	142	108	88	95901	061	7806	061	2.7	MBD	3	Positive	Negative	Negative	6
M	46	2	37.2	20	119	85	88	3659	061	7806	7802	2.13	AAD	0	Positive	Negative	Negative
F	81	3	39	18	148	63	83	061	061	4019	061	8.67	MBD	1	Positive	Positive	Negative
M	65	3	38.5	20	126	74	111	061				3.17	MBD	1	Positive	Negative	Negative
M	49	3	38.4	18	124	81	109	7806	061	7806	061	3.2	MBD	1	Positive	Negative	Negative
M	27	3	39.6	20	135	77	129	061	061	5990	061	1.9	MBD	1	Positive	Negative	Negative
F	58	4	37.2	20	106	76	101	061	061	2875	061	2.03	MBD	5	Positive	Positive	Negative	3
M	33	3	37.6	18	102	70	104	7806	7806	7806	042	20.25	MBD	7	Negative	Negative	Negative
F	37	3	38.2	18	108	67	90	061	061	061	061	2.6	MBD	1	Positive	Negative	Negative
M	48	3	38.6	18	139	85	89	7806	4650	061	7806	2.12	MBD	2	Positive	Negative	Negative	4
F	70	4	37.9	18	126	82	82	7806	5839	061	061	1.57	MBD	4	Positive	Negative	Negative
F	83	2	38.5	26	101	50	134	2859	2859	7824	2859	25.4	Admission	1
F	64	3	39.2	20	143	92	117	7806	78900	7806	78900	15.97	MBD	1	Negative	Negative	Negative
M	82	3	40.3	20	152	98	114	7806	5589	78701	7806	2.63	Admission	1	Positive	Negative	Positive	7
F	82	3	38.1	20	111	59	104	061	95901	92321	061	15.27	MBD	1	Positive	Negative	Negative
F	71	5	37.3	18	109	56	71	9273	95901	41401	9273	33.17	MBD	0
F	75	3	38.1	20	169	74	80	4111	4111	42731	78550	25.6	MBD	2	Positive	Negative	Negative	5
F	80	3	39.9	19	134	57	85	7806	061	7806	061	3.37	MBD	1	Positive	Negative	Negative
F	47	3	37.8	18	102	50	87	7804	7806	061	7806	5.75	MBD	6	Positive	Negative	Negative	5
F	49	3	37.8	18	102	50	87	061	7806	061	7806	2.05	MBD	5	Positive	Negative	Negative
M	28	3	38.5	19	154	91	133	95901	95901	87340	7806	2.33	MBD	1	Positive	Negative	Negative
F	72	3	37.1	16	136	89	81	38619	78650	061		6.55	MBD	0
M	66	3	37.6	20	122	84	90	5789	061	5997	5789	33.37	MBD	3	Positive	Negative	Positive	4
M	64	3	38.5	18	101	63	109	061	061			2.2	MBD	1	Positive	Negative	Negative	7
M	66	3	38.1	18	155	113	109	5789	78900	5789	7880	2.78	MBD	1	Positive	Negative	Negative
F	68	3	39	22	173	82	113	7806	061	25000	4019	3.75	MBD	1	Positive	Negative	Negative
F	55	3	37.2	18	157	100	93	061	53500	061	53500	2.53	MBD	0	Positive	Negative	Negative
F	74	4	37.9	20	155	71	92	7806	061	7806	061	2.17	MBD	1	Positive	Negative	Negative	7
M	84	3	37.8	20	103	66	93	7806	78609	061	7806	15.42	Admission	3	Negative
F	69	3	39	18	148	89	115	5990	5990	5990	7806	3.02	MBD	1	Positive	Negative	Negative
M	46	3	39	24	151	92	122	061	25000	061	25000	27.98	MBD	2	Positive	Negative	Negative
M	44	3	37.9	20	156	104	101	7806	585	7806	V429	3.87	MBD	1	Positive	Positive	Positive	5
F	55	3	39.2	20	157	99	115	7806	061	061	7806	9.17	MBD	1	Positive	Negative	Negative
F	65	3	38.3	18	163	89	116	78609	6829	78609	25000	6.75	MBD	1	Positive	Negative	Negative
F	69	3	38.6	29	152	66	98	486	4280	4279	4389	2.27	Admission	2	Positive	Negative	Negative	8
M	62	3	36.5	20	141	101	105	7806	25000	061	061	6.2	MBD	6	Negative	Positive	Positive
M	74	3	39.6	20	154	75	80	92411	8449	25000	061	10.78	MBD	1	Positive	Negative	Negative
M	52	3	38.6	20	131	77	84	7806	061	7806	061	6.8	MBD	1	Positive	Negative	Negative	2
F	97	3	39.5	18	151	82	118	92232	92400	92232	92400	5.52	Admission	1	Negative	Negative	Negative
M	58	3	36.3	18	105	68	80	8730	7806	061	4019	2.58	MBD	3	Positive	Positive	Positive
M	71	3	37.7	20	131	80	88	2740	41401	4389	7806	18.35	MBD	4	Positive	Negative	Negative
F	41	3	37.4	18	117	84	88	7806	7806	53500	53500	4.4	MBD	0	Positive	Negative	Negative	8
F	56	3	38.8	20	136	91	118	78900	25000	78900	25000	2.7	MBD	1	Positive	Negative	Negative
F	64	4	37.5	18	139	79	79	4111	78650	78650	41401	1.52	MBD	2	Positive	Negative	Negative
F	54	3	39.3	20	147	74	104	061	7806	5789	4019	2.57	MBD	1	Positive	Negative	Negative	4
M	84	3	36.7	16	130	77	84	7806	061	061	7806	17.23	Transfer	0	Positive	Positive	Positive	3
M	73	3	38.8	18	140	66	84	43401	25000	43401	25000	2.98	MBD	1
F	64	3	38.2	20	161	95	117	7806	7806	061	061	2.72	MBD	2	Positive	Negative	Negative
M	60	3	39.9	20	152	83	91	43401	061	7806	4019	6.18	MBD	2	Positive	Negative	Negative
F	51	3	38.4	18	97	66	77	061				30.47	MBD	1	Positive	Negative	Negative
M	84	3	38.9	20	150	86	109	43401	43401	4019	95901	2.7	MBD	1	Positive	Negative	Negative
M	45	3	39.5	20	187	122	116	7806	4659	061	7806	1.87	MBD	3	Positive	Negative	Negative	6
M	58	3	38.3	20	144	89	78	061	7806	7821	25000	1.98	MBD	1	Positive	Negative	Negative	5
M	78	3	38.8	20	130	62	100	6009	3331	3559	7806	4.27	MBD	1
F	72	4	37.4	20	102	59	66	7806	061	061	7806	2.88	MBD	2	Positive	Negative	Negative	7
M	58	3	37.8	16	100	63	76	7806	061	061	7806	2.6	MBD	2	Positive	Negative	Negative	5
M	25	3	37.9	18	115	78	90	7806	061	061	7806	2.28	MBD	5	Positive	Positive	Negative	7
F	77	3	39.5	20	121	49	79	78609	7806	7806	0879	22.38	Transfer	1	Positive	Negative	Negative
F	25	3	38.8	20	134	89	121	7806	061	061	7806	2.47	MBD	3	Positive	Negative	Negative
M	26	4	37.8	18	139	100	96	7804	061	061		1.98	MBD	7	Positive	Positive	Negative
F	54	3	38.4	20	141	76	85	7806	061	7806	061	3.88	MBD	3	Positive	Negative	Negative
F	68	3	36.5	20	108	61	76	7806	5990	7806	5990	11.92	MBD	5	Positive	Positive	Positive	3
F	49	3	38.3	18	139	104	99	061	7806			2.28	MBD	1	Positive	Negative	Negative
F	25	3	38.8	20	124	88	129	78900	5601	78900	92411	10.75	MBD	3	Positive	Negative	Negative	8
M	65	3	38.6	20	143	86	117	061	7806	1629	061	3.17	MBD	3	Positive	Negative	Negative	8
F	76	3	39.5	19	138	77	82	95901	4019	95901	4019	21.15	MBD	1	Positive	Negative	Negative	7
F	45	4	36.9	20	107	47	82	061	061			1.18	MBD	0
F	25	3	38.3	19	112	66	118	061	061	061	061	2.48	MBD	1	Positive	Negative	Negative
F	70	3	40.4	16	131	66	84	78701	25000	7804	25000	39.38	Transfer	2	Positive	Negative	Negative
F	57	3	38	20	158	90	102	7851	7851	42731	2909	14.43	MBD	1	Positive	Negative	Negative	7
M	37	3	37.3	20	124	89	82	7806	7840	061	7806	13.72	MBD	2	Positive	Negative	Negative	7
F	81	3	37.1	18	130	71	72	78701	4019	7804	78701	7.38	MBD	0
M	53	3	38.8	20	131	88	92	78650	78609	78900	78650	14.33	MBD	1
M	27	3	39.7	24	130	87	139	7806	061	7806	061	47.43	Admission	3	Positive	Negative	Negative
M	33	3	38.8	20	113	73	109	7806	061	7806	061	2.42	MBD	2	Positive	Negative	Negative	7
M	65	4	37.5	18	124	75	87	061	7806			3.6	MBD	2	Positive	Negative	Negative
M	69	3	38.1	20	160	98	90	7806	4019	4019	7806	2.85	MBD	1
M	62	2	36	18	124	100	98	78009	2396	78009	2396	17.4	Admission	0	Negative	Positive	Positive
M	51	3	38.1	20	156	91	98	061	7821	7806	061	4.75	MBD	4	Negative	Positive	Positive
M	71	3	38.6	20	145	80	98	061	7806	061	7806	3.92	MBD	1	Positive	Negative	Negative	3
M	84	3	37.6	20	160	86	80	6929	6929	47824	47824	7.05	Transfer	0	Positive	Negative	Negative
M	84	3	38.4	20	165	96	98	7806	95901	061	9100	40.37	AAD	3	Positive	Negative	Negative
M	67	3	38.6	20	163	116	116	2512	25000	4019	7806	21.37	MBD	1	Positive	Negative	Negative	6
M	54	3	36.6	24	155	109	125	4279	4279	7851	7851	33.82	MBD	0	Negative	Negative	Negative
F	58	3	39.1	18	149	79	104	061				3.12	MBD	1	Positive	Negative	Negative
M	79	4	37.7	20	154	105	75	7806	061	061	7806	2.17	MBD	3
M	28	3	40.2	20	133	82	128	7806	7806	061	061	3.63	MBD	2	Positive	Negative	Negative	6
M	60	3	38.3	18	129	86	94	7242	7243	7243	7242	12.72	MBD	1	Positive	Negative	Negative
F	69	3	38.7	18	144	77	109	78900	5589	78900	5589	2.5	MBD	1	Positive	Negative	Negative	6
F	25	3	38.5	18	110	68	112	7806	7806	061	061	2.58	MBD	1
M	35	3	39	18	144	94	100	95901	8028	95901	8028	3.32	MBD	4	Positive	Negative	Negative	7
M	26	3	38	20	120	79	95	92321	061	061		2.37	MBD	2	Positive	Negative	Negative	6
F	24	3	39	18	124	82	122	7806	061	7806		3.93	MBD	3	Positive	Negative	Negative	6
F	56	3	39.2	20	112	77	111	061	4019	061	4019	51.88	Admission	1	Positive	Negative	Negative	7
F	82	2	38.5	22	130	71	79	78609	78609	78009	25000	6.05	AAD	1
F	55	3	37.2	20	128	80	75	5990	7880	5990	7880	4.03	MBD	6
F	23	3	37.9	20	114	74	125	9221	92411	78900	78900	2.28	MBD	1	Negative	Negative	Negative
M	90	3	38.8	20	194	91	99	5589	78052	7806	5990	22.02	Admission	1	Positive
M	25	3	39.4	20	139	90	125	7806	7806	0389	7806	45.73	MBD	1
M	55	3	39.3	18	196	112	104	061	7806	193	061	3.25	MBD	1	Positive	Negative	Negative
F	23	3	37.9	20	126	80	116	061	061			1.3	MBD	1	Positive	Negative	Negative
M	76	3	37.5	18	136	89	98	7806	49390	061	7806	2.8	MBD	4	Positive	Positive	Negative
F	58	2	39.5	18	134	76	92	7840	78701	7100	7840	3.35	Admission	1	Positive	Negative	Negative
F	68	3	39.7	20	116	79	84	7806	061	7806		3.27	MBD	1	Positive	Negative	Negative
M	75	4	37.7	20	141	69	102	7806	4659	061	7806	2.58	MBD	1	Positive	Negative	Negative	7
F	91	1	37.7	30	115	66	56	6829	6829	25000	6829	59.72	Admission	1	Positive	Positive	Positive
F	72	2	38.8	22	189	126	147	92400	78009	78009	7806	17.52	Admission	1
F	79	3	38.4	20	132	91	109	78900	4019	78900	4019	18.35	Admission	1	Positive	Negative	Negative
F	44	3	39.6	18	116	80	130	3882	7806	061	7806	13.37	MBD	1	Negative	Negative	Negative
F	69	3	38.3	20	174	92	112	7840	7840	7840	4659	2.53	MBD	2	Positive	Negative	Negative	6
F	40	3	36.6	18	100	68	86	061	7806			2.07	MBD	1	Positive	Negative	Negative	8
M	72	3	39	20	105	64	86	486	486	4941	4389	64.73	Admission	1	Positive	Negative	Negative
F	75	3	37.6	20	120	62	77	7806	7806	061	7806	2.97	MBD	1	Positive	Negative	Negative	4
F	50	4	37	16	129	86	85	7806	061	061	7806	1.73	MBD	3	Positive	Positive	Positive
F	62	3	39.2	20	169	100	122	431	78701	78009	1809	22.82	MBD	1	Positive	Negative	Negative	7
M	71	3	38.9	19	125	67	115	061	7806	061	7806	1.78	MBD	1	Positive	Negative	Negative
M	46	3	38.9	18	116	69	93	7806	061	061	7806	23.85	AAD	1	Positive	Negative	Negative
M	41	3	39	20	111	60	118	061	7806			2.15	MBD	2
F	59	3	38.6	22	148	102	98	78009	5839	4019	75319	6.28	MBD	1	Positive	Negative	Negative
F	40	4	38.8	20	140	77	126	7806	7806	061	061	2.83	MBD	1	Positive	Negative	Negative
F	72	3	38.5	20	133	79	102	8830	7806	061	061	1.93	MBD	1	Positive	Negative	Negative
F	49	3	38.6	20	141	82	127	95901	9221	29595	95901	2	MBD	1	Positive	Negative	Negative
M	25	3	38.4	20	146	94	86	061	061	2869		3.63	MBD	1	Positive	Negative	Negative
F	45	3	38.4	20	127	81	111	7806	061	7806	061	5.45	MBD	1	Positive	Negative	Negative	8
M	87	3	39.4	20	163	72	94	4010	41401	4010	41401	22.23	Admission	2	Positive	Positive	Negative
M	51	3	39.7	20	188	100	132	061	7806	41401	4019	29.32	MBD	2	Positive	Negative	Negative	8
F	76	3	36.2	20	121	79	86	25000	4019	78820	25000	24.68	MBD	0	Positive	Positive	Positive	3
M	74	3	39.7	20	189	122	125	7806	061	7806	061	3.58	Transfer	2	Positive	Negative	Negative	6
M	37	3	37.9	20	120	69	107	7806	7806	061	061	2.77	MBD	0	Positive	Negative	Negative	6
F	52	3	39.2	20	155	81	124	463	463	463	463	3.5	MBD	1	Positive	Negative	Negative
F	63	4	36.6	18	117	54	63	7806	5589	061	061	3.03	MBD	3	Positive	Negative	Negative	5
F	46	4	37.4	20	102	66	57	061	061			3.38	MBD	6	Positive	Positive	Negative
M	74	3	36.8	20	125	78	68	85180	78079	95901	92320	17.33	Admission	0	Positive	Negative	Positive
M	49	3	38.9	18	157	105	95	7806	5715	5715	7806	14.43	MBD	1	Positive	Negative	Negative	6
M	48	4	38.9	18	157	105	95	7806	061	7806	061	3.55	MBD	1	Positive	Positive	Negative
M	54	3	37.8	18	118	89	98	7806	061	7806		3.77	MBD	3	Positive	Negative	Negative	5
F	70	3	38.4	20	170	112	118	5990	4659	7895	4019	2.88	MBD	2	Positive	Negative	Negative	6
M	77	3	36.7	20	122	61	113	2740	7806	25000	4019	28.7	MBD	2
M	67	3	39.8	24	157	79	116	7806	061	5119	061	8.25	Admission	3	Positive	Negative	Negative
F	87	3	38.8	18	180	95	105	7806	7806	7806	7806	28	MBD	1	Negative	Negative	Positive
M	66	3	39.5	20	163	90	103	7806	4878	41401	25000	19.08	MBD	3
M	36	3	37.7	20	135	83	89	0091	0091	061	061	19.68	MBD	3
M	32	4	37.5	18	124	84	91	7806	4878	7806	4878	2.6	Admission	5
M	48	3	37.1	20	150	96	114	6829	6827	6827	25000		Admission	0	Positive	Negative	Negative
M	82	3	37.5	20	109	71	80	061	78900	5789	061	7.38	Admission	3	Positive	Negative	Negative	6
F	66	3	38.1	18	121	75	98	78701	5789	4659	4659	5.55	MBD	1	Positive	Negative	Negative	7
F	56	3	36.6	18	130	81	75	78701	7806	061		3.45	MBD	3	Positive	Positive	Positive
F	75	3	39.5	20	164	90	112	7806	5990	5990	7806	2.48	MBD	2	Positive	Negative	Negative	6
F	28	3	38.6	20	146	95	114	7806	061	061	7806	1.35	MBD	1	Positive	Negative	Negative	5
F	44	3	38.7	20	113	74	132	061	7806			1.77	MBD	1	Positive	Negative	Negative
F	74	3	38.7	20	158	82	104	7806	061	5990	061	2.78	MBD	3	Positive	Negative	Negative
F	83	3	39.1	20	135	86	85	43401	4019	5640	5640	39.47	MBD	2	Positive	Negative	Negative	8
F	73	3	39.1	19	163	98	65	061	061	7806	061	2.4	MBD	1	Positive	Negative	Positive
F	79	3	37.4	20	164	72	66	061	41401	4019	061	5.82	MBD	3	Positive	Negative	Negative	6
F	64	4	37.7	20	102	62	67	061	061			3.48	MBD	2	Positive	Negative	Negative
M	73	2	36.8	20	85	60	127	78900	5640	7140	78900	14.58	Admission	0	Negative	Positive	Negative
F	47	3	36.6	20	135	92	64	7806	78701	7804	7806	2.27	MBD	0
F	47	3	37.1	18	117	66	77	78900	78900	53500	061	23.77	MBD	0
F	66	3	38.1	16	176	93	96	7806	061	7806		3.08	MBD	1	Positive	Negative	Negative
F	64	3	38.7	20	157	92	95	78900	78900	5589	78900	2.37	MBD	5	Positive	Positive	Positive
F	62	3	38.5	20	180	85	129	5589	5589	486	7806	4.47	MBD	1
F	48	4	37.8	18	116	77	104	061				2.25	MBD	1	Positive	Negative	Negative
M	48	3	37.8	18	116	77	104	7806	7806	061	061	1.98	MBD	1	Positive	Negative	Negative
F	38	3	38.6	18	119	70	105	78701	78900	061	7806	1.9	MBD	1	Positive	Negative	Negative	7
F	76	3	37.6	18	103	60	63	061	7806	061	7806	29.32	Admission	3
F	75	4	36.9	18	151	85	66	92231	061	061		4.98	MBD	0	Negative	Positive	Positive
M	71	2	37.6	22	167	109	138	87340	87340	9213	7802	7.18	EXPIRED	0	Positive	Negative	Negative
F	67	3	38.7	19	207	118	130	4019	43401	4019	43401	3.08	MBD	1	Positive	Negative	Negative
M	61	3	38.2	20	176	73	67	7806	7806	061	061	3.47	MBD	3
M	78	3	39.4	18	135	58	80	78900	78900	78900	78900	52.8	Admission	2	Positive	Negative	Negative
M	60	3	38.9	18	135	58	80	7806	7806	2875	7806	12.5	MBD	1
F	38	3	40.1	18	114	63	109	78900	78900	78900	5409	3.08	MBD	2	Positive	Negative	Negative	7
M	76	3	39.3	18	133	71	89	9221	92411	9130	9150	4.8	MBD	3	Positive	Negative	Negative
F	72	3	38.1	20	144	75	96	5589	061	061	061	2.35	MBD	1	Positive	Negative	Negative
M	30	3	38.6	20	121	85	111	7806	061	061	7806	1.95	MBD	2	Positive	Negative	Negative
F	67	3	38.7	20	139	80	104	99659	99659	585	99659	18.43	Admission	1	Positive	Positive	Positive
F	33	4	37.6	20	126	95	101	4659	061			1.58	MBD	4	Negative	Negative	Negative
M	55	4	38.8	20	121	88	92	8700	061	7806	061	3.65	MBD	1	Positive	Negative	Negative
M	47	3	36.5	20	142	99	58	7806	061	7806	2949	25.77	MBD	2	Positive	Positive	Negative
F	49	3	39	20	124	72	101	1830	061	1830	061	15.93	MBD	4
M	86	3	38.3	18	180	77	84	7806	4019	061	7806	4.2	MBD	1	Negative	Negative	Negative	5
F	73	3	39.3	19	169	102	83	7806	4019	7806	4019	22.02	MBD	1	Positive
F	56	3	38.5	20	119	87	116	7880	7880	78900	59010	26.47	MBD	3	Negative	Negative	Negative
F	61	3	37.5	18	138	89	87	7840	061	7821	5589	4.05	MBD	1	Negative	Negative	Negative
M	67	3	38.3	20	126	78	86	7806	061	5997		2.68	MBD	2	Positive	Negative	Negative
F	37	3	37.4	20	131	88	101	6238	6238	061	V222	2.72	MBD	2	Negative	Negative	Negative
F	46	3	37.4	20	131	88	101	78650	8470	78039	78650	1.47	MBD	2	Positive	Negative	Negative
F	52	3	39.3	20	103	59	76	061	7806	49390	061	3.8	MBD	3	Positive	Negative	Negative	7
F	59	3	36.8	18	136	74	82	061	7806			2.55	MBD	3	Positive	Positive	Negative
M	87	3	38.1	20	187	77	85	78609	78609	49390	78609	15.88	MBD	1	Positive	Negative	Negative
F	75	3	38.1	20	187	77	85	7806	7806	061	061	2.23	MBD	1	Positive	Negative	Negative
F	50	3	38.6	18	131	82	110	7806	061	061	7806	2.75	MBD	2	Positive	Negative	Negative
M	33	3	38.2	20	122	71	102	7806	7806	49390	7806	21.42	MBD	1	Positive	Negative	Negative
F	77	4	35.7	24	138	102	53	78701	7242	25000	4019	26.38	MBD	2	Positive	Negative	Positive
F	81	3	38.6	20	147	74	82	7806	7806	5589	43401	7.5	AAD	1	Positive	Negative	Negative	6
F	65	3	39.9	20	128	62	92	7806	061	7806	061	2.2	MBD	1	Positive	Negative	Negative
F	75	4	36.6	18	144	91	81	78701	78079	78701	78079	85.13	Admission	5	Positive	Negative	Positive	3
M	76	3	38.9	18	130	62	84	5997	5997	4019	5839	2.73	MBD	1	Positive
M	64	3	38.9	20	151	92	109	43401	41401	25000	4019	2.57	MBD	1	Positive	Negative	Negative	5
M	61	3	39.9	20	137	82	138	6829	4019	6829	4019	1.93	MBD	1	Positive	Negative	Negative
F	71	3	39.4	20	144	74	114	92420	7804	7804	4019	25.68	MBD	1	Positive	Negative	Negative	7
M	70	3	36.3	18	169	106	77	78900	78900	78900	2875	3.35	AAD	0	Negative	Negative	Positive
M	50	3	38.2	20	137	97	90	8408	7806	463	463	17.42	Transfer	1
F	42	4	37.6	16	105	73	88	7806	061	7806	061	3.18	MBD	1	Positive	Negative	Negative
F	74	3	37.6	20	127	76	61	7806	061	061	7806	3.23	MBD	1	Positive	Negative	Negative
F	69	3	38.7	26	162	87	135	20410	7806	20410	486	43.18	Admission	1	Negative	Negative	Negative
F	65	3	38	20	110	71	84	7806	25000	061	7806	21.1	Transfer	3	Positive	Negative	Negative
F	68	3	39.2	18	161	82	116	462	9330	5990	7806	3.37	MBD	1	Positive	Negative	Negative	7
F	58	3	38.1	18	125	89	93	7806	061	5789	7806	12.83	MBD	3	Positive	Negative	Negative
F	56	4	37.3	20	92	57	80	7806	061	7806	061	0.73	MBD	0
M	62	3	38.6	20	139	90	103	7806	7806	486	061	3.85	MBD	2	Positive	Negative	Negative
M	20	3	38.6	20	139	90	103	061	061	061		2.57	MBD	3	Positive	Negative	Negative
F	22	3	38.7	20	154	76	124	92420	95901	920	061	5.87	MBD	2	Positive	Negative	Negative
F	49	3	38.7	20	164	104	104	7806	4660	7806	486	2	MBD	1	Positive	Negative	Negative
F	62	3	38.6	20	117	68	95	7806	53081	7806	53081	16.05	Admission	3
M	73	3	37.6	18	155	86	87	4878	4878	41401	25000	3.95	Transfer	0	Positive	Negative	Negative	3
M	20	3	37.4	18	124	63	76	78900	061			1.55	MBD	0
F	78	3	38.6	18	98	53	76	95901	7806	061	4019	23.43	MBD	2	Positive	Negative	Negative
F	69	3	38.7	20	157	74	96	7806	5990	25000	7806	3.07	MBD	2	Positive	Negative	Negative	6
M	64	3	37.4	20	123	76	83	7291	7291	V0262	2740	7.25	AAD	2
F	76	4	36.1	18	156	87	60	5589	7806	061	5589	5.25	AAD	1	Negative	Positive	Positive
M	43	3	36.1	18	156	87	60	061				1.6	MBD	1
F	76	3	37.7	20	129	61	86	7806	7804	5839	25000	12.9	MBD	0
M	40	3	38.2	20	146	100	116	061	7806			6.87	MBD	1	Negative	Negative	Negative
M	77	3	37.7	22	136	85	113	5789	7802	7802	78039	23.5	Admission	3
F	77	3	37.3	18	145	91	93	5589	5409	78900	5409	73.52	MBD	0	Positive
F	73	3	38.8	20	96	50	98	0092	2765	20490	0092	3.7	MBD	2	Positive	Negative	Negative
M	47	3	39.3	20	143	96	90	7806	7806	061	7806	4.05	MBD	1	Positive	Negative	Negative	7
F	60	3	38	18	115	76	90	061	2875	061	5733	54.23	Admission	0
F	20	3	38.8	20	124	77	116	53500	061	061	7806	4.08	MBD	1	Negative	Negative	Negative
M	59	3	38	18	140	73	91	5589	25000	4019	5589	25.35	Admission	3
F	64	3	38.1	20	166	89	102	061	7806	061	7806	2.6	MBD	2	Positive	Negative	Negative
M	90	1	37	36	162	115	128	7806	78900	5761	7806	24.43	Admission	0	Positive	Negative	Negative
F	55	4	37.4	18	156	87	85	95901	86800	92411	9130	1.97	MBD	2	Positive	Negative	Negative
F	39	4	36.5	20	127	89	79	7806	7806	463	463	2.35	MBD	7	Positive	Positive	Negative
F	61	3	38.9	20	145	91	98	92232	9110	92310	92311	11.22	MBD	1
F	53	3	39	20	152	96	111	061	7806	4019	061	2.45	MBD	1	Positive	Negative	Negative
M	50	3	40	20	149	98	129	9925	9925	2768	78900	42.17	Admission	2
M	51	4	36.5	19	127	88	75	7806	061	7806	061	2.22	MBD	7	Positive	Positive	Positive
M	34	3	38.4	20	129	89	101	7806	78039	7806	78039	4.52	MBD	1	Negative	Negative	Negative	5
F	74	4	36.7	20	159	109	72	061	2875	7806	061	2.35	MBD	3
M	62	4	36.7	20	110	72	75	7806	061	5589	7806	2.6	MBD	6	Positive	Positive	Positive
F	20	3	38.4	20	155	88	138	7806	7589	7806	061	1.93	MBD	1	Positive	Negative	Negative
F	22	3	39.2	18	112	72	112	95901	95901	7806	95901	2.52	MBD	0	Positive	Negative	Negative	7
F	54	3	36.7	18	117	53	69	7880	8479	92232	3561	3.98	MBD	0	Negative	Negative	Negative
M	51	3	38.2	20	175	107	116	061	7806	7242	061	6	MBD	1	Positive	Negative	Negative	8
F	53	3	38.3	18	118	76	95	061	061	061	5789	2.92	MBD	1	Positive	Positive	Negative
F	57	3	38.2	20	174	134	106	5789	585	5715	585	31.37	Admission	1	Negative	Negative	Negative
M	72	3	39.3	20	157	98	112	7806	6829	25000	4019	14.98	Admission	1
F	22	3	40.1	20	132	71	123	061	061	061	6238	3.02	MBD	1	Positive	Negative	Negative
F	86	1	39.3	48	137	74	127	9351	7806	78609	7806	6.43	Admission	1
F	74	3	37.1	20	141	69	92	061	78701	061	78701	8.72	Admission	3
M	34	3	37.8	20	129	86	109	7806	7806	061	061	3.85	MBD	3	Negative	Negative	Negative
F	24	3	37.6	16	101	67	91	78900	7806	061	78900	23	MBD	2	Positive	Negative	Negative	8
F	63	4	37.1	18	156	101	93	061	061			2.57	MBD	1	Negative	Positive	Positive
F	55	3	36.9	18	136	91	81	9221	7806	9221	25000	11.83	MBD	1
F	70	3	39.2	20	141	77	125	7806	78900	7806	78900	4.22	MBD	1	Negative	Negative	Positive	4
M	69	3	39.5	20	152	84	106	78609	78609	486	78609	40.03	AAD	1	Negative	Negative	Negative
F	88	3	40.4	20	132	64	109	7806	7806	6829	7806	23.63	Admission	1
M	68	3	35.4	19	166	81	62	061	061			2.6	MBD	0	Positive	Positive	Positive
M	66	4	37.2	18	143	89	73	85300	85300	7821		6.88	MBD	0	Positive	Positive	Positive
M	65	3	37.9	20	148	96	91	4660	4660	41401	25000	3.13	MBD	1
F	80	3	38.8	20	154	91	115	7242	4019	78701	7806	11.28	MBD	1
F	71	3	38.4	20	176	90	77	061	7806	061	7806	8.78	MBD	2	Positive	Negative	Negative	8
F	49	3	39.3	20	143	93	103	78900	5409	5409	7806	4.93	MBD	1	Positive	Negative	Negative
M	56	3	36.6	20	118	87	92	92411	92421	92311	38619	5.92	MBD	5	Negative	Negative	Positive
M	94	3	36.6	20	118	87	92	5640	7806	78609	42490	36.77	AAD	0	Positive	Positive	Negative
F	34	3	38.7	24	128	85	118	7806	061			3.83	MBD	2	Positive	Negative	Negative	5
M	63	3	40	20	137	91	107	7840	7243	4010	7840	3.17	MBD	1	Positive	Negative	Negative
M	57	3	37	20	106	67	68	9779	78609	78609	78009	1.93	MBD	1
M	19	3	38.5	18	131	84	95	8910	9224	7806	7452	2.83	MBD	1	Positive	Positive	Negative
F	75	3	37.4	19	151	96	67	5589	7806	061		2.35	MBD	2	Positive	Negative	Positive
F	62	3	37.7	18	143	84	86	2869	061	7806	2869	36.38	MBD	7
F	61	4	36.3	18	144	84	97	7804	4878	4878	7804	3.15	MBD	0
F	60	3	37.2	20	123	82	94	4660	7863			5.05	MBD	8
M	67	3	38.6	18	148	83	127	25000	25000	25000	3572	3.38	MBD	1	Negative	Negative	Negative
F	93	3	38.2	20	118	71	118	5601	4280	4019	5601	2.72	Admission	1	Negative	Negative	Negative
M	70	3	37.1	20	126	86	71	061	2875	5789	061	3.87	Transfer	0	Positive	Positive	Positive	4
M	26	3	39	19	157	102	102	7806	4878	061	061	1.6	MBD	1	Positive	Negative	Negative
M	20	3	38.9	24	128	62	124	78650	25011	78650	7840	3.28	Admission	2
M	36	4	37.5	20	124	81	73	78701	30390	061	061	3.28	MBD	0	Positive	Positive	Negative
M	29	3	38.9	20	138	84	118	7806	7806	061	061	3.27	MBD	1	Positive	Negative	Negative	6
M	43	3	37.3	18	141	101	92	8409	92320	061		2.22	MBD	1
M	62	3	37.9	20	114	80	98	061	7806			3.18	MBD	2	Positive	Positive	Positive
F	59	3	38.7	18	168	112	103	7880	7806	7840	061	3.65	MBD	1
M	19	3	38.4	20	133	81	91	4659	7806	7806	7806	2.68	MBD	1	Positive	Negative	Negative
M	63	4	37.5	20	127	79	98	78609	78609	41401	4111	7.72	MBD	1	Positive	Negative	Negative	5
M	25	3	38.8	18	155	100	76	7806	5990	7806		2.52	MBD	1	Negative	Negative	Negative
F	81	3	38.4	18	125	57	101	5789	7806	7806	061	7.67	MBD	1	Positive	Negative	Negative	6
F	83	3	38.8	21	100	54	85	7804	4019	25000	41401	43.12	Admission	1
F	49	3	37.1	20	140	101	86	7806	061	7806	061	2.2	MBD	1	Positive	Positive	Negative
M	45	3	38	20	173	116	111	6829	6829	2740	2740	2.55	MBD	3
F	71	4	38.4	16	169	74	89	7806	4660	25000	4019	17.6	AAD	3	Positive	Negative	Negative
M	42	3	38.5	20	131	89	105	061	061			3.32	MBD	1	Positive	Negative	Negative
M	36	3	39.3	20	141	119	115	7806	7806	061	061	3.75	MBD	1	Positive	Negative	Negative	7
M	45	3	36	20	119	88	90	78701	38619	38619	38619	6.15	MBD	0	Positive	Negative	Negative	7
F	44	3	37.8	20	125	85	81	7806	7806	4878	7806	1.77	MBD	2
F	38	3	39.2	20	101	70	103	7806	061	7806	061	1.43	MBD	3
M	21	4	37.1	18	120	69	81	7806	061	7806		1.33	MBD	3
F	79	3	38.8	20	178	89	130	78900	78900	4019	5990	106.13	Admission	1
F	23	3	39	18	117	75	116	7806	7806	061	5990	2.6	MBD	1	Positive	Negative	Negative
F	52	3	39	20	155	106	120	7806	7806	061	7806	11.98	MBD	1
M	27	3	38.4	18	123	71	117	061	7806	061	7806	2.67	MBD	2	Positive	Negative	Negative
F	59	3	38.3	18	121	61	122	5990	1891	5990	9975	1.63	MBD	1	Positive	Negative	Negative	7
M	67	3	39.9	20	173	92	115	7806	41401	7806	41401	3.97	MBD	2	Positive	Negative	Negative	7
M	36	4	37.4	18	112	67	96	061	7806	061	7806	3.63	MBD	2	Negative	Positive	Negative
F	67	3	38.2	20	144	88	104	7806	061	061	7806	2.58	MBD	1	Positive	Negative	Negative	7
F	51	4	36.6	18	98	68	67	061				2.65	MBD	4	Positive	Positive	Negative
M	75	3	40	20	139	79	101	78900	78900	4280	78900	25.3	Admission	1	Positive	Negative	Negative
F	37	3	37	20	91	63	76	78900	78701	061	061	19.62	MBD	5
F	72	3	38.8	19	124	78	105	78609	78609	486	78609	5.52	MBD	1
F	47	3	38.6	20	95	63	82	061	7806			2.82	MBD	2
M	47	3	38.1	18	136	83	92	7806	4660	7806		0.23	MBD	1
M	58	3	38.7	20	147	100	138	38610	7806	7850	38610	42.82	Admission	1
M	38	4	36.9	20	120	76	76	7806	7806	5589	7806	2.5	ESCAPE	1	Positive	Positive	Negative
F	82	3	36.6	20	116	85	95	78701	78701	78701	78791	4.98	MBD	3	Positive	Negative	Negative	5
F	77	3	39.3	20	189	106	80	5990	1800	5990	3862	28.87	MBD	1	Positive	Negative	Negative
F	41	3	38.5	18	133	89	101	78609	486	4660	78609	2.67	MBD	1	Positive	Negative	Positive
M	80	3	37.6	18	116	67	62	78900	57420	4019	57420	47.87	Admission	1	Positive	Negative	Negative	4
F	19	3	39.1	19	123	82	105	7806	78701	061	061	2.42	MBD	2	Positive	Negative	Negative	6
F	44	3	38	18	116	80	101	7806	061	061	7806	1.75	MBD	2	Positive	Negative	Negative
M	54	3	38.5	18	146	82	95	7806	061	061	7806	2.17	MBD	1
M	37	3	36.8	20	127	79	104	7806	061	7806	061	21.1	MBD	2	Positive	Negative	Negative	6
F	70	3	40.6	20	147	83	102	7806	7806	5990	7806	37.77	MBD	1
F	18	3	39.8	18	110	73	120	061	061			2.72	MBD	1	Positive	Negative	Negative	7
M	42	3	36.1	20	112	79	67	29570	29500	29570	29590	2.73	MBD	0	Positive	Negative	Negative
F	55	3	39.4	20	139	97	123	3580	3580	7806	061	2.78	MBD	2	Positive	Negative	Negative
M	76	3	40.1	20	138	57	59	7806	061	7806	061	40.27	Admission	2	Positive	Negative	Negative	5
M	56	3	37.3	18	127	76	86	7291	25000	5733	7806	10.15	MBD	0	Negative	Negative	Negative
F	18	3	38.5	20	126	78	99	78900	5589	462	061	2.72	MBD	4	Positive	Positive	Negative
M	61	3	40.1	18	109	64	132	7806	6009	78830	25000	3.6	MBD	1	Positive	Negative	Negative
M	51	3	37.9	20	126	90	75	7806	30000	7806	30000	13.03	MBD	4	Positive	Positive	Negative	6
F	70	3	37.1	20	114	75	87	78650	7080	38619	78701	24.53	Admission	0	Positive	Positive	Positive	5
F	78	3	38.6	20	188	89	97	95901	8910	8479	7806	22.83	Transfer	1	Positive	Negative	Negative	8
F	68	3	36.5	18	144	97	80	88003	88100	88003	88100	41.6	Admission	0	Negative	Positive	Positive	3
M	36	3	38.1	20	141	98	77	7806	7806	42731	061	1.58	MBD	1	Positive	Negative	Negative
M	20	3	36.3	20	124	70	86	7806	061	061	7806	2.68	MBD	3
F	67	3	39.8	20	174	92	104	7806	78900	061	7806	3.75	MBD	1	Positive	Negative	Negative
M	67	3	39.3	20	143	94	111	7806	25000	6829	061	3.43	MBD	1	Positive	Negative	Negative
F	18	4	39	20	123	73	103	462				4.48	MBD	4	Positive	Negative	Negative
M	62	3	36.7	18	158	108	97	061	7806	0579	061	2.07	MBD	3	Negative	Positive	Positive
F	18	3	39.4	18	126	76	128	061	7806	061	7806	1.57	MBD	1	Positive	Negative	Negative
F	50	3	38.9	18	140	84	100	061				2.77	MBD	1	Negative	Negative	Negative	6
M	81	3	37.8	20	169	110	127	4389	4019	25000	7806	3.35	MBD	1	Positive	Negative	Negative	8
F	59	3	38.3	18	128	85	93	7806	7806	5990	5990	1.7	MBD	1
F	59	3	38.3	18	164	88	96	7806	061	7806		2.3	MBD	1	Positive	Negative	Negative
F	72	3	39.9	20	162	96	106	7806	78701	061	7806	23.38	MBD	2	Positive	Negative	Negative
F	31	3	38.2	20	127	84	116	78900	78900	5990	78900	6.4	MBD	4
F	77	3	36.4	19	115	63	78	78900	78900	5589	7804	20.23	Admission	0
M	84	3	38.5	20	139	85	104	7806	7806	2768	7806	20.42	MBD	1
M	18	3	38.2	18	137	93	120	462	5589	5589	061	2.13	MBD	1	Positive	Negative	Negative
M	75	2	38.2	22	153	64	68	5640	5839	5640	5839	39.35	Admission	1
M	73	3	39.5	20	126	70	98	78609	5839	41401	4019	2.18	MBD	1	Positive
F	49	3	37.5	20	162	95	62	4660	38619	78900	78650	28	MBD	1
M	31	4	37.6	20	117	79	96	5589	7806	061	5589	1.77	MBD	1	Positive	Negative	Negative	6
F	89	2	40.3	30	182	87	128	78609	7806	53500	061		MBD	1	Positive	Negative	Negative
F	62	3	37.5	18	108	72	74	061	061	061		3.03	MBD	2	Positive	Negative	Negative
F	72	3	37.6	20	160	108	80	920	061	5990	4019	72.17	Admission	0
F	41	4	37.7	18	137	94	94	061	061	061	7806	3.05	MBD	1	Positive	Positive	Negative	3
F	79	3	39.3	20	134	86	137	7806	78701	7806	78701	15.03	MBD	1	Positive	Negative	Negative
F	85	3	36.5	18	133	59	68	42731	42731	7100	42731	12.35	Admission	0
M	83	3	38.2	20	140	73	113	78650	78650	41401	53081	1.78	MBD	1	Positive	Negative	Negative
F	64	3	39.1	20	167	72	93	7806	7806	061	061	2.45	MBD	2	Positive	Negative	Negative
M	50	3	38.1	18	105	68	83	061	061	4019	061	5.87	Admission	3
F	18	3	38.5	18	112	69	109	7806	7806	061		2.45	MBD	1	Positive	Negative	Negative
F	76	3	39.5	18	120	62	93	92421	92411	92421	92411	9.18	MBD	2	Positive	Negative	Negative
M	45	3	38.4	18	158	96	103	7806	53081	7806	78900	1.75	MBD	1
M	61	3	38.9	18	143	92	103	061	5990	061	5990	4.28	MBD	1	Positive	Negative	Negative
M	63	3	38.9	20	106	65	118	4541	7804	8470	38619	2.9	AAD	2	Positive	Negative	Negative
F	68	3	36.7	20	106	65	118	7806	061	7806	7806	3.05	MBD	4	Positive	Negative	Negative
F	79	3	39.2	20	141	97	84	5990	7806	061	7806	5.75	MBD	2	Positive	Negative	Negative
M	64	3	37.9	20	159	98	101	43401	78701	5589	25000	32.95	MBD	1	Negative	Negative	Negative
F	60	3	36.6	18	113	77	81	7806	7840	061	7806	1.55	MBD	5
M	18	3	39	18	145	81	127	7806	7806	061	7806	2.2	MBD	2	Positive	Negative	Negative
M	32	3	38.7	20	136	59	112	7806	061	061	7806	2.2	MBD	2
F	34	3	38	22	141	100	124	2967	29699	2967	3019	29.97	MBD	2	Positive	Negative	Negative
F	82	3	39.5	20	192	113	111	5789	4019	5789	4019		MBD	1	Positive	Negative	Negative
M	78	3	38.9	20	156	81	111	061	7806	061	7806	2.33	MBD	1	Positive	Negative	Negative
F	71	3	38.3	20	137	70	78	7806	7806	25000	29595	5.02	Admission	1
M	76	2	38.2	20	157	83	88	7806	585	7806	585	30.03	AAD	1	Negative	Negative	Positive
M	43	4	37.1	16	109	72	72	061				2.02	MBD	1	Positive	Negative	Negative
M	36	3	39.1	20	142	84	102	7806	7806	061	7806	2.82	MBD	2	Positive	Negative	Negative
F	74	1	39.6	20	124	67	109	7806	7806	0389	7806	60.5	Admission	4
F	23	3	38.7	20	105	63	118	7806	061	7806	061	3.48	MBD	2	Positive	Negative	Negative	6
F	44	3	38.6	24	108	74	106	061	7806			2.12	MBD	3	Positive	Negative	Negative
M	31	4	37.4	20	135	81	78	061	7806	7821		1.93	MBD	5	Negative	Positive	Negative
M	87	3	38.5	18	156	75	88	7806	061	061	7806	2.07	MBD	1	Positive	Negative	Negative
F	55	3	38.2	20	118	74	91	95901	92411	78650	78650	7.1	MBD	2
M	72	3	37.2	20	186	65	74	061	7806	25000	061	19.88	Admission	0	Positive	Positive	Positive	6
M	19	3	39.2	20	143	86	105	061	7806	061	7806	1.57	MBD	2	Positive	Negative	Negative
M	84	3	37.9	21	134	74	102	7804	4389	4019	41401	13.5	Admission	1	Negative	Negative	Negative
F	70	3	38.4	22	148	86	95	78609	78609	4280	7806	2.08	MBD	1	Positive	Positive	Positive
F	30	3	38.5	20	115	75	119	7840	7806	061	061	3.88	MBD	1	Positive
F	42	4	37.5	20	124	77	82	061				1.22	MBD	0
F	47	3	39	20	140	90	114	7806	061	7806	061	1.6	MBD	1	Positive	Negative	Negative
F	24	4	36.6	20	106	76	64	7806	061	7806		2.13	MBD	7	Positive	Positive	Negative	1
M	57	2	39.3	24	194	122	145	81381	92320	92231	81381	14.03	MBD	1
F	73	3	38.1	18	151	88	74	78609	25000	4019	4019	8.27	MBD	3	Positive	Negative	Negative	4
M	67	3	39	20	118	63	112	7806	061	061	7806	7.27	MBD	2	Positive	Negative	Negative
F	73	4	37.4	16	118	60	76	78650	7806	061	061	3.18	MBD	1
F	21	3	37.4	16	118	60	76	061	7806	061	7806	3.05	MBD	1	Positive	Negative	Negative	7
F	92	3	38.2	18	165	81	89	6827	4019	6827	4019	3.77	MBD	1	Positive	Negative	Negative
F	57	3	38.1	20	99	60	73	7806	7806	061	061	2.02	MBD	1	Positive	Negative	Negative
M	16	4	38.1	20	99	60	73	462	061	462	061	3.3	MBD	1	Positive	Positive	Positive
F	30	3	38.9	20	119	80	103	7806	061	2869	061	1.87	MBD	3	Positive	Negative	Negative	7
M	18	3	37.2	20	141	97	102	061				0.4	MBD	3
F	61	3	39	20	178	100	118	4660	7806	4660	7806	1.88	MBD	2
M	38	3	38.1	20	129	85	101	7806	061	061	7806	3	MBD	1	Positive	Negative	Negative
F	36	3	40.3	20	118	71	95	7806	061	5733	7806	3.88	MBD	1	Positive	Negative	Negative
M	83	3	36	20	103	58	79	2875	061	2875		3.22	Admission	0	Positive	Positive	Positive
F	90	3	36.5	22	203	92	73	72210	92400	72210	92400	24.13	MBD	0
M	46	3	36.9	18	128	91	73	78650	78650	2722	78650	3.05	MBD	3	Positive	Negative	Negative
F	49	3	39.3	18	180	134	115	7802	95901	920	9100	1.67	MBD	1	Positive	Negative	Negative
F	65	3	38	20	168	97	95	7806	7806	7806	4878	2.77	MBD	3	Positive	Negative	Negative
F	45	4	37.9	20	149	98	125	061	4878	7806	061	2.82	MBD	1	Positive	Negative	Negative	7
F	55	3	38.5	18	173	104	132	8470	7840	7806		2.87	MBD	2	Positive
M	75	2	38.2	20	106	63	120	7806	4389	25000	4019	4.58	Admission	0	Positive	Positive	Positive
M	37	3	38.5	18	147	97	126	6082	061	7806		3	MBD	1	Positive	Negative	Negative
M	50	3	37.5	20	115	78	58	061	2875	2875	061	39.05	Transfer	2	Negative	Positive	Positive
M	55	3	36.4	20	117	79	115	4659	25000	4659	25000	53.6	Admission	0	Positive	Negative	Negative
M	73	3	38.4	20	133	82	107	7804	78900	56081	1541	5.57	MBD	2	Positive	Negative	Negative
F	59	4	37.7	20	128	82	92	061				2.18	MBD	1	Positive	Negative	Negative	6
M	62	3	38.2	18	143	100	119	9351	7806	4019	6000	20.88	Admission	1	Positive	Negative	Negative	8
M	48	3	38.5	20	127	87	125	87343	87342	95901	42731	2.8	MBD	1	Positive	Negative	Negative	7
F	83	3	37	18	109	79	70	43401	78650	78009	43401	40.87	AAD	0
F	72	3	38	20	185	114	129	7806	7806	4878	4878	4.35	MBD	1	Positive	Negative	Negative	7
F	52	3	39.3	20	175	91	112	061	061	4019	061	3.22	MBD	2	Positive	Negative	Negative
F	63	3	39.1	18	165	109	122	7806	061	7806	061	7.32	MBD	2	Positive	Negative	Negative	8
M	46	3	39.3	18	122	66	125	061	1539	061		1.82	MBD	1	Positive	Negative	Negative
M	81	3	39.4	20	148	87	133	061	7806	061	7806	2.38	MBD	1	Positive	Negative	Negative	6
M	90	1	37.3	20	106	61	123	6829	25000	6829	25000	31.38	Admission	0
M	50	3	38.3	20	134	80	124	7806	061	061	7806	1.85	MBD	1	Positive	Negative	Negative
M	18	4	37.3	18	104	67	88	061	061	7806		2.13	MBD	2	Negative	Negative	Negative
M	41	3	38.7	20	112	80	125	7806	7806	V0261	7806	2.75	MBD	1	Positive	Negative	Negative
F	62	3	37.2	18	105	61	63	43401	43401	25000	4019	6.1	Transfer	2	Positive	Negative	Negative	7
F	56	4	37.4	20	126	78	82	4659	061	061		3.65	MBD	2	Positive	Negative	Negative
F	74	4	37	18	165	90	72	7806	7806	7804	7806	3.28	MBD	0	Positive	Positive	Positive
F	70	3	39.2	20	177	67	97	9181	061	7806	061	8.63	MBD	1	Positive	Negative	Negative
F	63	4	39.5	24	183	100	117	4659	7806	5990	7806	2.97	MBD	1	Positive	Negative	Negative
M	55	3	39.3	24	140	77	115	7806	061	4019	061	2.72	MBD	1	Positive	Negative	Negative	8
F	52	4	36.3	18	131	105	59	78900	53190	4019	78900	8.03	Admission	7	Positive	Positive	Positive
F	22	3	38.1	18	116	77	118	7806	7806	061	061	9.1	MBD	1	Negative	Negative	Negative
M	23	3	38	20	112	72	123	7806	061	061	7806	1.4	MBD	1	Positive	Negative	Negative	6
F	76	3	37.2	20	146	99	69	95901	9221	86800	92421	3.68	MBD	0	Negative	Positive	Positive	2
M	76	3	40.1	20	145	77	113	7806	5990	7806	5990	4.2	Admission	2
M	68	3	36.8	20	134	63	64	7804	4389	25000	4019	14.68	Admission	0	Positive	Positive	Negative
M	74	2	36.8	20	134	63	64	78900	1541	78900	1541	2.48	MBD	0	Negative	Negative	Negative	3
F	53	3	38.8	18	164	81	106	5589	5589	061	5589	3.3	MBD	0	Positive	Positive	Negative	5
M	38	3	38.3	22	102	58	111	7806	7806	486	7806	2.37	MBD	7
M	61	3	37.4	18	154	93	108	7806	061	4019	30390	2.78	MBD	1	Positive	Negative	Negative	7
M	20	3	38.6	20	145	90	111	061	7806			1.83	MBD	2	Positive	Negative	Negative
M	45	4	36.9	20	127	87	75	7806	9953	061	7806	3.82	MBD	1	Positive	Positive	Negative
F	59	3	38.3	20	120	87	113	9245	7806	7806	25000	5.97	MBD	1	Positive	Negative	Negative	4
F	78	3	38.3	20	120	87	113	2869	2869	2875	5733	18.98	Admission	1	Positive	Negative	Negative	5
M	31	3	40.1	20	118	66	130	3061	30000	7806	7806	21.42	MBD	1
F	50	4	36.7	16	109	67	66	7806	7806	061	061	2.57	AAD	7
M	15	3	38.5	18	145	86	108	462	061	061	061	2.83	MBD	2	Positive	Negative	Negative
M	70	3	38.9	22	134	78	109	7806	4019	41401	7806	1.82	MBD	1	Positive
F	33	3	38.9	22	134	78	109	7806	7806	061	061	3.67	MBD	1	Positive	Negative	Negative	8
F	39	3	38.7	18	135	87	105	061				4.82	MBD	1	Positive	Negative	Negative
F	52	3	37.1	18	137	95	75	78701	061	78701	061	2.28	MBD	0	Positive	Negative	Negative
M	67	3	36.5	20	94	69	71	7806	061	061	7806	3.38	MBD	6	Positive	Positive	Negative	3
M	51	3	38.7	18	100	62	116	061				3.05	MBD	1	Positive	Negative	Negative
F	35	3	38.6	18	120	79	130	7806	4659	061	7806	2.58	MBD	1	Positive	Negative	Negative
F	59	3	38.8	20	132	77	101	5990	5990	340	340	2.17	MBD	1	Positive
F	36	3	38.5	20	128	77	118	7806	061	7806		1.85	MBD	2
M	21	3	40.4	20	104	54	136	9221	92400	061	061	1.57	MBD	1	Positive	Negative	Negative	7
M	15	3	38.1	20	144	84	111	82380	82380	82381	82380	11.58	MBD	1	Negative	Negative	Negative
F	36	3	38.7	20	131	79	108	7806	061	7806	061	5.17	MBD	1	Positive	Negative	Negative
M	40	4	37	18	131	84	67	7806	061	7821	061	3.18	MBD	1	Positive	Negative	Negative
M	46	4	36.9	18	127	72	102	061				2.65	MBD	2	Positive	Negative	Negative
M	56	4	36.9	20	167	116	78	061	061	5589		2.03	MBD	2	Positive	Negative	Negative
M	18	3	38.8	20	131	80	98	462	462	061		2.35	MBD	1	Positive	Negative	Negative
M	66	3	39.6	20	121	70	113	061	7806	061	7806	13.73	MBD	2	Positive	Negative	Negative	8
M	31	3	39.3	20	128	82	89	5589	061	061	5589	3.2	MBD	1	Positive	Negative	Negative
M	45	4	37.4	18	135	103	120	061	7821	061	7821	2.22	MBD	1	Positive	Negative	Negative	8
F	35	3	39.4	20	143	280	126	061	7806	061	7806	2.47	MBD	1	Positive	Negative	Negative	6
M	58	3	38.4	20	118	81	112	7806	7806	78900	061	5.7	MBD	1	Positive	Positive	Positive
F	56	3	38.4	18	108	73	106	7806	20300	5990	7806	3.02	MBD	1
M	15	3	38.5	22	110	51	111	061	061	061	462	3.22	MBD	2	Positive	Negative	Negative	5
M	19	3	39.5	20	141	61	112	7806	061	061	7806	1.6	MBD	1	Positive	Negative	Negative	6
F	56	3	38.4	18	133	80	115	7806	78900	78900	7806	2.55	MBD	1	Positive	Negative	Negative
F	15	4	36.7	20	151	96	83	7821				1.62	Admission	3
M	15	4	37.9	20	123	86	112	462	462	061		2.73	MBD	6	Positive	Positive	Negative
M	82	3	38.3	20	120	59	71	9351	185	185	7806	32.42	MBD	2	Positive	Negative	Negative
M	16	4	36.6	18	117	67	77	061				3.75	Admission	3
F	34	3	38.9	20	106	70	109	7806	061	061	7806	13.43	MBD	1	Positive	Negative	Negative
F	46	3	37.9	20	152	80	78	7806	7806	061	061	2.53	MBD	1
M	55	4	37.2	16	171	95	74	7806	061	061	7806	0.23	MBD	2	Positive	Negative	Negative
F	68	3	39.4	20	140	74	106	5990	4878	7806	5990	18.55	Admission	2
F	73	3	37.1	18	105	60	82	78900	5589	41401	25000	27.88	Admission	0	Positive	Negative	Negative
M	15	3	37.7	20	160	100	93	7821	061			3.2	MBD	5	Positive	Negative	Negative
M	74	3	38.4	18	100	62	95	7806	78900	061	7806	16.55	Admission	1	Positive	Negative	Negative	8
M	42	4	37	18	132	90	120	6829	7806	7806	061	3.88	MBD	4	Positive	Positive	Negative
M	24	3	38.6	20	150	89	118	061	7806			1.35	MBD	1	Positive	Negative	Negative
F	38	3	38.5	20	167	107	131	7806	7806	061	061	3.5	MBD	1	Positive	Negative	Negative
M	19	4	37.3	17	114	75	84	061	7806	061	061	3.1	MBD	1	Negative	Negative	Negative
M	72	3	39.2	20	156	90	78	5920	5920	78900	5920	18.07	Admission	1	Negative	Negative	Negative
M	88	3	38.3	20	136	65	129	4660	4660	53190	53081	28.13	Admission	1	Positive	Negative	Negative	8
F	26	3	39.7	18	153	77	108	7806	4659	061	061	3.07	MBD	1	Positive	Negative	Negative	8
M	50	3	38.4	18	136	86	107	7806	7806	061	061	2.07	MBD	1
M	70	3	39.2	24	128	82	137	7806	4389	4019	7806	2.2	MBD	2	Positive	Negative	Negative
F	90	1	39.2	24	128	82	137	42789	4019	42789	4019	37.88	Admission	1
M	53	3	38.7	20	193	119	112	6829	25000	6829	25000	45.03	AAD	2	Negative	Negative	Negative
M	74	3	38.4	20	112	63	98	3682	6000	3682	6000	1.62	MBD	2	Positive	Negative	Negative
F	63	3	37.8	20	120	69	70	7806	061	7806		2.27	MBD	2	Positive	Negative	Negative
F	56	3	39.7	24	158	90	125	7804	7806	061	7806	3.15	MBD	1	Positive	Negative	Negative
M	15	4	37.2	18	150	91	81	462	7821			2.37	MBD	1	Positive	Negative	Negative
F	68	4	36.6	18	155	93	89	061	4019	061	4019	2.02	MBD	1	Positive	Negative	Negative
F	14	3	38.8	18	130	91	107	8470	061	061	061	4.23	MBD	3	Positive	Negative	Negative
M	34	3	38.2	20	148	76	98	7806	061	061	7806	1.18	MBD	6
F	31	3	39.6	20	136	94	95	84500	7806	061	7806	5.62	MBD	2	Positive	Negative	Negative	7
F	34	4	36.9	18	129	84	96	061	7806	061	7806	1.97	MBD	4	Positive	Negative	Negative	2
M	32	3	39.7	20	134	83	138	7806	061	7806		2.5	MBD	2	Positive	Negative	Negative
M	14	3	39.2	20	121	67	125	061				2.18	MBD	1	Positive	Negative	Negative	6
F	25	3	39	20	125	77	134	7806	4659	4659	7806	2.58	MBD	1
M	58	2	39.3	18	174	103	119	7806	486	061	496	25.95	Admission	1	Positive	Negative	Negative	7
F	71	3	37.9	18	124	85	67	4019	7804	7804	7804	3.42	MBD	2
M	14	3	38.8	20	111	66	99	462	061	061	2765	2.83	MBD	2	Positive	Negative	Negative	6
M	33	3	38.1	20	194	107	111	585	585	4871	585	3.18	MBD	2
M	72	3	38.6	18	136	66	100	7806	3320	061	7806	2.5	MBD	1	Positive	Negative	Negative
M	67	2	37.6	20	99	62	97	5789	4019	5789	4019	10.52	Admission	0	Positive	Negative	Negative	6
F	78	3	39.2	20	127	71	95	53500	53500	5601	1809	46.28	MBD	1
F	77	3	36.4	18	105	72	79	7804	78701	061	7804	4.32	MBD	0	Positive	Positive	Negative
F	21	3	38.7	20	124	81	104	7806	061	7806		1.17	MBD	4
F	58	4	37.7	16	138	75	94	7806	061	42490	061	3.35	MBD	1	Negative	Negative	Negative
M	24	3	39.2	20	132	82	117	061	061	061		4.5	MBD	1	Positive	Negative	Negative
M	33	3	39	20	127	83	120	7806	061	061	7806	6.63	MBD	1	Positive	Negative	Negative	7
M	79	2	39.3	22	122	78	107	43401	43401	4019	2740	36.12	MBD	1
M	86	3	39.7	22	145	80	102	7806	4019	7806	4019	15.82	MBD	2	Positive	Negative	Negative	6
M	54	3	37.7	16	119	75	95	7806	061	7806		5.38	MBD	3	Positive	Positive	Negative
M	19	3	38.6	20	139	73	113	7806	061	7806	061	17.4	MBD	1	Positive	Negative	Negative	7
M	31	3	38.7	20	113	64	119	81600	7806	061	061	2.55	MBD	1	Positive	Negative	Negative
F	71	3	38	20	152	89	102	061	7806	061	7806	2.55	MBD	1	Positive	Negative	Negative	7
F	79	3	38.8	24	192	95	106	95901	7806	25000	4019	92.17	Admission	1
M	17	3	38	18	121	73	71	061	061	061	2765	5.77	MBD	1	Positive	Negative	Negative
M	44	3	38	18	134	88	78	5589	20511	5589	78900	21.32	MBD	2
M	67	3	39.6	20	174	89	113	7806	25000	4019	2875	20	Admission	2
M	59	3	39	20	151	90	101	92321	7806	7806	061	5.97	MBD	1	Positive	Negative	Negative	3
M	77	3	37.4	20	128	71	59	78900	7806	061	78900	3.58	MBD	0	Negative	Negative	Negative
M	31	3	38.5	20	115	64	104	061	061	2875		3.6	MBD	3	Positive	Negative	Negative	6
M	15	3	39.2	20	110	72	126	462	462	061	462	2.65	MBD	2	Positive	Negative	Negative
M	74	3	38	20	125	74	85	7806	061	6000	7806	8.93	Transfer	1	Positive	Positive	Positive
F	13	3	39	21	116	72	112	061	061	7840	061	3.92	MBD	2
M	44	3	38.8	20	148	111	110	061	7806			2.02	MBD	1	Positive	Negative	Negative	7
M	27	3	39.3	20	140	98	127	7806	061	7806		2.08	MBD	1	Positive	Negative	Negative
F	44	4	37.7	20	124	86	59	7806	061	7806		3.13	MBD	3	Positive	Negative	Negative
M	77	3	39.9	20	151	84	115	7806	25000	4019	6000	16.07	Admission	1	Negative	Negative	Positive
F	76	3	38.6	20	138	81	88	7806	4019	7806	4019	6.15	MBD	3	Negative	Positive	Negative
M	18	3	38	20	120	75	85	7821	462	7821	462	16.45	MBD	1
F	53	3	37	20	120	75	85	7806	4659	1749	7806	2.9	MBD	0	Positive	Negative	Negative	6
M	73	3	39.6	20	161	85	91	4019	4019	7804	4019	20	Admission	2	Positive
M	52	3	38.7	20	138	94	87	061	061			4.15	MBD	2	Positive	Negative	Negative
M	80	4	36.7	20	144	98	100	5589	4019	25000	061	4.85	MBD	0	Positive	Negative	Negative	7
F	46	3	40	20	144	98	100	061	061	061		1.83	MBD	1
M	60	3	39.8	20	140	81	120	38619	061	5733		15.6	Admission	1	Positive	Negative	Negative
F	14	3	39.2	20	113	75	125	4660	485	462	7821	3.23	MBD	1	Positive	Negative	Negative
M	75	3	38.1	20	144	71	97	7806	43401	7806	43401	72.33	Admission	4
M	70	4	36.5	20	144	71	97	7806	061	7806		2.5	MBD	0	Positive	Negative	Negative
M	56	3	38.4	20	125	79	112	7806	4659	7806	042	2.85	MBD	1	Positive	Negative	Negative	7
M	32	3	37.7	20	152	93	95	9221	061	7806	061	1.65	MBD	2	Negative	Negative	Negative
M	34	3	37.7	18	123	79	87	78900	7806	78900	7806	4.53	MBD	0	Negative	Negative	Negative
F	38	3	37.7	20	110	72	87	061	78900	061	78900	3.38	MBD	0	Negative	Negative	Negative
M	28	3	38.5	20	114	74	105	7806	061	7806		2.38	MBD	1	Positive	Negative	Negative	7
M	27	3	38	18	124	86	113	061	7806	061	7806	27.67	MBD	3	Positive	Negative	Negative	6
M	29	3	37.5	20	140	80	95	7806	7806	061	061	2.9	MBD	4	Positive	Negative	Negative
F	36	3	39.1	20	110	74	102	061	7806	061	7806	3.02	MBD	4	Positive	Negative	Negative
M	58	3	38.6	20	159	102	102	5990	59010	5990	59010	1.92	MBD	2	Positive	Negative	Negative
M	61	3	39	20	182	97	109	061	7806	061	7806	2.33	MBD	1	Positive	Negative	Negative	6
F	63	3	37.7	18	126	80	109	7806	5589	5990	7806	2.77	MBD	3	Positive	Negative	Negative
M	32	3	39	18	128	84	106	4658	7806	7840	7840	3.43	MBD	1	Positive	Negative	Negative	7
M	13	3	38.5	20	123	80	107	5589				2.22	MBD	3	Negative	Negative	Negative
F	31	3	36.4	18	130	86	98	061	061	7806		4	MBD	4	Negative	Negative	Negative
F	52	3	39.1	20	172	93	107	061	7806	25000	061	2.55	MBD	2	Positive	Negative	Negative
F	39	3	37.9	20	125	98	82	061	7806	7821		2.47	MBD	5	Positive	Positive	Negative	0
F	13	3	38.8	20	128	70	160	061				2.18	MBD	1	Positive	Negative	Negative	6
F	42	4	36.8	18	118	84	94	061	061	061		3.25	MBD	5	Positive	Positive	Negative
F	59	3	38	18	175	111	84	78609	78609	496	4111	3.2	MBD	1	Positive	Negative	Negative
M	44	3	39.2	18	119	80	93	78609	042	78609	042	4.25	MBD	1	Positive	Negative	Negative
F	61	3	38.4	20	168	93	93	8798	8798	8798	6829	3.65	MBD	2	Positive	Negative	Negative	8
F	44	3	39	18	115	76	101	061				7.68	MBD	1	Positive	Negative	Negative
F	73	3	38.9	18	151	89	99	920	7806	7806	061	4.73	MBD	1	Positive	Negative	Negative
F	35	4	37.2	20	121	84	82	061	061			2.53	MBD	7	Positive	Positive	Positive
M	21	3	38.5	20	143	90	107	7806	37200	061	061	2.33	MBD	2	Negative	Negative	Negative	5
F	46	3	38.5	20	143	90	107	7806	7806	061	061	2.32	MBD	2	Positive	Negative	Negative
F	60	3	39.7	18	141	79	117	7806	061	7806	061	7.23	MBD	1	Positive	Negative	Negative
F	62	3	38.4	20	109	53	95	7806	7806	061	061	1.9	MBD	1	Positive	Negative	Negative
M	15	3	39.4	20	130	84	139	462	061	061	2765	12.82	MBD	2	Positive	Negative	Negative
F	88	2	40.2	25	151	100	98	78550	78550	78550	2767	25.22	Admission	1	Negative	Negative	Negative
F	76	3	36.9	20	138	62	70	78900	25000	4019	20203	21.62	Admission	0
M	49	3	39.4	18	143	94	134	78900	5789	5789	5789	42.88	MBD	1	Positive	Negative	Negative
F	45	4	36.8	20	113	77	83	8860	8860	7806	061	4.92	MBD	2	Positive	Negative	Negative
M	53	3	37	18	106	76	98	061	061			2.93	MBD	0	Negative	Positive	Positive
F	52	3	37.4	16	122	87	87	37272	4279	7851	7804	2.67	MBD	5	Positive	Positive	Positive
F	13	3	38.7	22	137	81	128	74560	74560	7806	78701	2.5	MBD	1	Positive	Negative	Negative
M	13	3	36.7	20	115	76	96	7806	7291			7.77	MBD	4
M	33	3	36.3	20	132	88	79	6089	7806	061	7806	1.73	MBD	1
F	80	2	37.8	20	102	70	159	7851	7851	42731	7851	30.78	Admission	2	Positive	Negative	Negative
M	12	3	39.1	20	144	95	109	7804	7804	V416	7804	2.27	MBD	2
F	32	3	38.9	20	122	74	122	061	7840	7806	061	2.87	MBD	1	Positive	Negative	Negative	7
F	73	3	37.1	20	138	88	76	061	2874	1830	061	2.6	MBD	0	Positive	Negative	Positive
F	50	3	39.5	18	156	65	91	7806	061	7806	061	1.42	MBD	1	Positive	Negative	Negative
M	59	3	38.9	20	143	88	116	061	061	061		2.77	MBD	2	Positive	Negative	Negative
M	44	3	38.4	18	142	102	119	061				2.4	MBD	1	Positive	Negative	Negative
F	63	3	39	20	107	61	78	7880	7880	7291	7806	13.47	MBD	1	Positive	Negative	Negative	7
M	12	3	38.3	24	129	90	102	462				3.08	MBD	1	Positive	Negative	Negative
F	42	3	38.9	24	128	78	106	7806	061	7806		1.97	MBD	2	Positive	Negative	Negative
F	71	3	37.2	20	99	48	66	061	061	78550	061	43.85	Admission	0
M	16	3	39.5	24	124	56	119	061	7291	061	7291	2.73	MBD	1	Positive	Negative	Negative
F	56	3	38.2	20	141	83	119	4019	4010	43401	4010	2.62	MBD	1	Positive	Negative	Negative
F	73	3	38.9	18	110	70	58	7806	4019	7806	4019	3.33	MBD	1
M	37	4	37.5	20	114	81	88	4659	4659	4659		5.13	MBD	0	Positive	Positive	Negative	5
M	76	3	38.6	20	159	88	109	95901	92320	95901	92320	3.18	MBD	1
F	76	3	38.5	20	136	77	106	7806	7806	5990	5990	48.38	Admission	1	Positive	Negative	Negative
M	65	3	39.2	20	142	76	117	4878	061	7806	061	5.08	MBD	1	Positive	Negative	Negative	8
M	37	3	39.2	20	112	66	125	29590	29595	29590	7806	4.1	MBD	1	Positive	Negative	Negative
F	73	3	38.7	18	119	67	84	8208	8208	82021	5589	52.73	Admission	1	Positive
M	51	4	37.2	18	105	66	93	061	061	25000	4019	3.42	MBD	1	Positive	Negative	Negative	7
F	62	2	39.5	20	105	66	135	585	585	25000	585	70	Admission	2
M	66	2	38.8	28	135	92	138	78609	7806	25000	1459	6.08	MBD	1	Positive	Negative	Positive
M	76	3	39.3	20	125	74	111	7806	496	4019	7806	48.92	Admission	1	Positive
F	42	3	39	24	125	83	136	7806	061	061	7806	3.02	MBD	2	Positive	Negative	Negative
F	65	3	37.6	20	143	70	86	7806	4019	07054	7806	2.55	MBD	2
F	57	3	38.6	18	138	83	92	7806	061	7806		2.17	MBD	1	Positive	Negative	Negative	6
F	44	3	38.7	18	97	65	107	061	7806	7840	1749	2.57	MBD	1	Positive	Negative	Negative	7
F	16	3	38	20	126	92	128	462	061	462		2.75	MBD	3	Positive	Negative	Negative
M	69	3	38	18	138	87	101	78650	585	25000	4019	2.43	MBD	2	Positive	Negative	Negative
M	33	3	38.1	20	150	95	95	5789	78900	7880	78900	4.03	MBD	3
M	64	3	39.2	22	164	82	119	061	7806	061	7806	3.43	MBD	1	Positive	Negative	Negative
F	61	3	37.3	18	104	76	90	5839	7806	4019	7806	19.28	MBD	3
M	33	3	39.2	18	123	78	94	7806	4878	7806		4.8	MBD	1	Negative	Negative	Negative
F	68	3	39.2	20	129	64	88	7806	7806	5589	7806	6.52	MBD	1
M	60	3	38.2	20	149	106	88	7806	4019	5839	7806	2.5	MBD	7
F	13	3	39.6	20	116	76	135	7806	061	061		2.8	MBD	2	Positive	Negative	Negative
F	91	3	39.5	18	141	75	96	061	7806	061	7806	3.75	AAD	1	Positive	Negative	Negative
F	31	4	37.2	20	112	75	80	95901	7806	7806	6110	2.6	MBD	3	Positive	Positive	Negative
F	52	3	37.7	20	140	91	94	7806	7806	7806	5990	90.27	MBD	1	Positive
F	73	3	39	24	171	86	105	061	061	061	78701	1.8	MBD	1	Positive	Negative	Negative
M	52	3	38.9	20	140	89	105	78650	7806	061	78650	7.73	MBD	3	Positive	Negative	Negative	7
M	78	3	39.6	18	127	68	87	9351	7806	4019	7806	5.53	MBD	2	Negative	Negative	Negative	6
M	22	3	38.2	18	116	72	120	4659	7806	4878	7806	2.65	MBD	1	Positive	Negative	Negative	6
F	72	4	37.3	82	126	74	105	5640	5640	5640	061	2.85	MBD	0	Negative	Positive	Negative
M	64	3	39.2	20	115	75	97	061	061	2875		3.32	MBD	1	Positive	Positive	Positive
M	11	4	37.1	18	122	70	90	7821	7821	061		2.27	MBD	0	Positive	Positive	Negative
F	69	3	39.1	16	145	64	88	25000	4019	7806	25000	22.15	Transfer	1
F	37	3	38	20	130	83	116	7840	7804	78900	6829	14.02	Admission	4
M	13	4	37.7	19	129	92	86	78900	78900	5409	061	12.52	MBD	2		Negative	Negative
F	60	3	39.9	20	137	84	109	061	7806	25000	4019	11.72	MBD	3	Positive	Negative	Negative	5
F	63	3	37.6	20	128	92	82	7806	4878	78900	7806	18.92	MBD	4
M	85	3	38.5	20	148	104	109	4111	4111	41401	496	3.52	MBD	1	Positive	Negative	Negative	5
F	53	3	37.2	20	104	67	93	78701	38610	7806	1828	2.72	MBD	2	Positive	Negative	Negative	5
F	27	4	35.7	18	124	88	63	86800	78900	86800	78900	2.98	MBD	1	Negative	Negative	Negative
F	28	3	38.5	20	166	79	122	78650	061	7806		2.05	MBD	3	Negative	Negative	Negative	3
F	36	3	38.4	18	173	122	102	7100	7100	7806	061	2.12	MBD	1	Positive	Negative	Negative
F	47	3	39.3	20	108	53	80	7806	061	7806	2859	2.92	MBD	1
F	53	3	39.2	18	139	81	100	7806	7806	78701	7806	3.22	MBD	1	Negative	Negative	Negative
M	35	3	37.1	16	127	88	103	5212	5212	9245	6829	38.75	MBD	1	Negative	Negative	Negative
F	51	3	39.2	19	126	88	128	061	7806	29699	061	1.72	MBD	1	Positive	Negative	Negative
M	79	3	38.5	81	119	70	101	41401	78650	78650	41401	7.88	MBD	1	Positive	Negative	Negative
F	37	3	37.7	20	98	65	81	5990	5990	78701	5990	17.38	MBD	1	Positive	Negative	Negative
F	66	3	39.7	18	146	84	105	7806	3499	7806	3499	3.27	MBD	1	Positive	Negative	Negative	8
M	37	3	39	20	115	75	120	7806	49390	7806	49390	2.98	MBD	2	Positive	Negative	Negative	6
M	33	3	39	19	115	76	105	7806	5589	061	061	1.9	MBD	2	Positive	Negative	Negative	6
F	56	3	38.7	20	130	87	91	7806	075	7806	075	15.57	MBD	1	Positive	Negative	Negative
M	65	3	38.8	20	113	75	94	7806	4660	7806	53081	3.25	MBD	1
F	86	3	39.9	16	124	78	90	2512	2512	25000	4019	4.03	Admission	2	Positive	Negative	Negative
M	31	3	39.5	18	151	99	120	7806	061	061	7806	2.05	MBD	2	Negative	Negative	Negative
F	14	4	39	24	106	79	122	462	061	462	061	2.38	MBD	1	Positive	Negative	Negative
F	31	3	37.1	20	98	65	90	061	5589	7806		4.28	MBD	0
M	75	3	37.3	18	122	62	65	51881	25000	51881	5184	3.27	MBD	5
F	25	3	38	18	128	82	130	7806	061	7806	061	1.5	MBD	2	Positive	Negative	Negative
M	36	3	38.4	24	111	61	118	7806	061	061	7806	2.15	MBD	1	Positive	Negative	Negative
F	37	3	38.8	18	107	64	91	7806	4659	7806	4659	2.03	MBD	1	Positive	Negative	Negative	7
M	11	4	36.8	18	107	64	91	7821				1.05	MBD	3	Positive	Positive	Negative
M	23	3	38.8	20	120	75	105	7806	061	7806	5589	24.37	MBD	2
F	77	3	38.8	20	181	79	81	92421	92400	9221	8910	5.32	MBD	3	Positive	Negative	Negative
F	73	3	36.8	20	107	77	80	78900	5789	78900	5789	3.62	Admission	0	Negative	Positive	Positive	9
M	18	3	39.5	22	134	59	120	7806	061			3.17	MBD	2	Positive	Negative	Negative	6
F	13	3	39.5	22	111	63	115	462	462	061	462	2.65	MBD	2	Positive	Negative	Negative
M	59	3	38.3	20	160	96	138	7806	25000	78900	25000	8.55	MBD	1
M	51	3	39.4	20	146	95	103	061				2.12	MBD	1	Positive	Negative	Negative
M	10	4	37.5	18	112	81	91	462	7089			3.8	MBD	6
M	11	4	37.8	20	118	83	86	6829	6829	3829	7806	39.3	MBD	2	Positive	Negative	Negative
F	89	3	38.5	20	132	75	118	7806	061	7806		3.2	MBD	1	Positive	Negative	Negative
F	42	4	36.8	18	135	85	103	7821	7821	7821	24290	2.45	MBD	3	Positive	Negative	Negative
M	30	3	38.2	20	135	101	102	7806	5789	0579	7806	37.52	MBD	2	Positive	Positive	Negative	6
M	41	3	38.3	18	139	101	112	462	7806	061	5839	2.08	MBD	1	Positive	Negative	Negative
F	38	3	38.5	20	128	89	111	061	061	061	7806	1.58	MBD	3	Positive	Negative	Negative
M	72	3	39.6	20	137	80	78	7806	25000	4019	061	24.48	Admission	4	Positive	Negative	Negative	5
M	52	3	38.9	20	143	95	132	7806	7806	061	061	2.88	MBD	1	Positive	Negative	Negative	6
F	67	3	39.1	18	158	78	83	061	7806			2.5	MBD	1	Positive	Negative	Negative
F	32	3	40.2	22	111	69	135	7806	061	7806		1.77	MBD	1	Positive	Negative	Negative
F	45	3	38.6	18	122	76	105	061	7806	061	7806	2.98	MBD	1	Positive	Negative	Negative
F	60	3	39.4	20	169	87	110	7806	7806	7840	7840	4.45	MBD	1
F	42	3	38.1	20	122	78	91	7806	061	061	7806	2.07	MBD	1	Positive	Negative	Negative
F	74	3	39.3	20	133	77	122	7806	25000	061	7806	16.28	AAD	5
M	32	3	39.6	24	133	72	155	061	061	4659		4.88	MBD	2
F	78	3	37.2	20	130	70	77	061	061	2875	7804	20.62	MBD	2	Negative	Positive	Positive
M	49	3	38.7	20	100	65	100	7806	061	7806	78900	5.63	Transfer	2	Positive	Negative	Negative	8
M	37	3	38.1	18	133	85	107	061	7806			3.5	MBD	1	Positive	Negative	Negative
M	23	3	39.2	20	129	86	105	5589	4659	7806	5589	2.93	MBD	4	Positive	Negative	Negative	6
M	10	3	38.8	20	117	79	133	7856	53500	5990	7840	7.45	Admission	1	Positive	Negative	Negative
M	64	3	39.3	20	143	86	104	7804	4389	25000	4019	12.93	MBD	1
F	12	3	37.1	18	111	74	84	7806	061	061	7806	3.42	MBD	2	Positive	Negative	Negative	7
F	37	3	38.4	20	99	64	117	7806	061	061	7806	13.03	MBD	2	Positive	Negative	Negative	5
M	34	4	36.9	18	154	91	99	061	061	061		2.5	MBD	0	Positive	Positive	Positive
F	37	4	39.3	16	113	76	88	9229	7806	061	061	2.35	MBD	1	Positive	Negative	Negative
M	27	3	39.3	18	111	66	79	7806	061	7806	061	3.17	MBD	2
F	15	4	36.6	19	114	66	70	7806	061			1.62	MBD	2	Positive	Negative	Negative
F	40	3	38.1	20	130	89	109	061	7806	7821	061	4.32	MBD	2
F	67	3	38.7	20	134	81	90	4019	4019	7804	7806	14.67	MBD	1	Positive	Negative	Negative
F	10	3	39.3	20	111	65	136	78900	78900	78900	5589	10.1	MBD	2	Negative	Negative	Negative	4
M	55	4	36.5	20	134	92	76	4659	061	4659	061	2.82	MBD	3	Positive	Positive	Negative	5
M	13	3	40	20	122	66	114	462	462	061		2.12	MBD	2	Positive
M	77	2	37.9	20	171	89	64	7806	78701	061	25000		MBD	1	Positive	Positive	Positive
M	15	3	36.6	19	116	86	65	78900	78900	78900	061	5.17	MBD	2	Positive	Negative	Negative
M	48	4	37.2	20	131	80	63	061	061			1.7	MBD	7	Positive	Positive	Positive
M	88	3	38.1	22	104	57	81	1536	7806	1536	7806	7.53	MBD	1	Positive	Negative	Negative
F	31	3	38.4	20	109	59	121	061	7806	7806	6330	6.42	MBD	1
F	63	4	37.5	18	152	86	96	061	7806	061	7804	2.47	MBD	1	Positive	Negative	Negative
M	9	3	39.6	18	114	71	113	84500	462	7454	462	2.25	MBD	1	Positive
M	80	3	37.6	20	173	99	94	3331	4019	25000	78609	41.42	Admission	0	Negative	Negative	Negative	4
M	75	3	39.3	24	145	77	124	7806	4019	061	7806	8.87	MBD	1	Positive	Negative	Negative	6
M	85	3	38.4	19	166	76	102	7804	7841	4019	7806	6.78	AAD	1	Positive	Negative	Negative
M	58	3	38.2	20	123	87	76	7806	4019	7806	4019	10.88	Admission	1
F	30	3	38.2	20	148	115	127	061	7806			2.65	MBD	3	Positive	Negative	Negative
M	48	3	38.1	18	122	81	94	7806	061	7806		3.93	MBD	1	Negative	Negative	Negative
M	70	3	37.9	18	125	81	72	78791	5589	78820	78820	1	AAD	0	Positive	Negative	Negative
M	56	4	37.3	18	133	75	89	5921	4659	7806	061	2.87	MBD	7	Positive	Positive	Negative	3
M	28	3	38.3	16	116	77	77	7806	061	5789	7806	2.47	MBD	3	Positive	Negative	Negative
M	34	3	38.7	18	152	94	109	061	7806	061	7806	1.98	MBD	2	Positive	Negative	Negative	5
M	62	3	38.9	20	123	66	97	7806	061	061	7806	6.82	MBD	1	Positive	Negative	Negative	6
M	71	3	37.1	18	125	88	81	9953	9953	5733	7821	3.25	Admission	0	Positive	Positive	Positive
F	12	3	38.1	24	95	56	109	462	462	462	061	3.75	MBD	3	Positive	Negative	Negative
M	34	3	39	20	113	73	77	7806	061	7806		2.32	MBD	3	Positive	Negative	Negative	5
M	13	3	40.1	20	135	67	128	462	462			1.67	MBD	2	Positive
F	73	3	38.2	18	155	70	85	7806	7806	78650	7804	46.65	MBD	2
F	44	3	37.6	20	116	72	94	061	7821			3.93	MBD	5	Positive	Positive	Negative	5
M	9	3	39.3	26	102	60	151	462				2.98	MBD	2	Positive	Negative	Negative
F	97	3	38	18	146	55	88	95901	7806	061	061	10.97	Admission	2	Negative	Negative	Positive
F	12	3	39.1	20	118	68	107	9490	061			2.68	MBD	5	Positive	Positive	Positive
M	71	3	36.9	18	115	72	71	78900	7806	7806	4878	1.75	Admission	3
M	82	3	38.4	20	105	58	97	4271	4271	41401	25000	3.63	MBD	1	Negative	Negative	Negative
F	29	3	38.6	22	128	89	123	V059	061	7806	061	3.87	MBD	3	Positive	Negative	Negative	7
F	27	3	38.2	18	122	83	103	92311	92303	9233	92411	2.68	MBD	3	Positive	Negative	Negative	6
F	42	3	38.4	18	111	74	70	7806	7806	5990	1420	12.07	MBD	2	Positive	Negative	Negative	7
F	75	2	37.9	26	185	104	72	78650	78650	41401	7806	3.15	Admission	0	Positive	Negative	Negative	8
F	9	3	39.8	26	112	76	125	486	462	061	061	10.95	MBD	4	Positive	Negative	Negative
F	75	1	37.2	24	86	40	79	78550	78609	78550	78609	27.62	Admission	0	Positive	Positive	Positive
M	76	3	38.6	20	130	75	71	7806	25000	4019	4389	3.93	MBD	1
F	70	3	38.4	20	120	56	83	7806	25000	061	7806	12.95	MBD	1	Positive	Negative	Negative	8
F	9	2	39	20	133	95	121	2870	5990	6930	2765	3.65	Admission	3
F	73	3	39.3	20	167	86	111	78900	78900	5750	78900	2.17	MBD	3	Positive	Negative	Negative
M	64	3	38.8	24	135	81	102	061	7806			2.08	MBD	2	Positive	Negative	Negative
M	42	3	39.1	20	127	86	98	486	486	42490	486	3.13	MBD	1	Positive	Negative	Negative
F	8	3	36.5	20	107	71	104	7806	7821	7821	061	2.18	MBD	2	Positive	Positive	Positive
F	75	3	39	20	172	118	103	061	061	25000	4019	1.72	MBD	1	Positive	Negative	Negative
F	18	3	38	20	111	72	109	061	7806	061	7806	15.53	MBD	1	Positive	Negative	Negative
M	40	4	35.5	20	126	91	90	4660	7806			1.88	MBD	5
F	80	4	37	20	140	86	80	78701	78701	78701	061	2.1	AAD	2	Negative	Positive	Positive
F	45	3	39	18	130	73	86	061	7806	061		2.07	MBD	1	Positive	Negative	Negative	7
M	36	3	39.1	20	121	69	122	78900	5929	5990	5929	2.97	MBD	2	Positive	Negative	Negative
F	11	3	37	20	116	76	94	462	7821			1.23	MBD	2
F	29	3	39	20	106	71	99	7840	5589	4878	78900	2.22	MBD	2	Positive	Negative	Negative	6
F	39	3	37.9	20	115	82	102	061	7806	061	7806	3.43	MBD	2
F	16	3	38.6	19	119	73	121	462	462	061	061	4.4	MBD	1	Positive
M	63	4	38	20	151	90	102	87340	87340	7806	4878	2.05	MBD	2	Positive	Negative	Negative
F	33	3	37.2	20	111	70	78	78650	78650	5839	4019	3.87	Admission	2	Positive	Positive	Negative
F	27	3	39.5	20	145	84	131	7806	061	7806	061	2.7	MBD	1	Positive	Negative	Negative
F	56	3	39.2	20	103	72	58	7806	7806	5733	2875	3.38	Admission	1
F	17	3	39.2	20	128	79	126	061	061	061	2859	2.38	MBD	1	Negative	Negative	Negative
M	71	3	38.3	20	152	83	98	95901	81200	8820	95901	3.47	MBD	1	Negative	Negative	Negative
M	42	3	38.7	20	143	76	113	7806	7806	061	7806	2.48	MBD	2	Positive	Negative	Negative	7
F	50	3	38.4	18	115	69	102	061	7806	061	7806	2.65	MBD	1	Positive	Negative	Negative
M	78	1	37.3	25	120	70	86	25000	6829	25000	6829	40	Admission	3
F	46	3	38.2	18	100	62	91	7806	061	061	7806	2.52	MBD	1	Positive	Negative	Negative	8
F	72	1	36.5	20	78	47	72	7802	95901	95901	920	24.2	Transfer	0	Positive	Positive	Positive
M	71	3	38.3	18	149	74	96	7806	7806	061	061	3.43	MBD	1
M	21	3	38.8	20	166	94	121	061	061			3.37	MBD	1	Positive	Negative	Negative
M	85	3	38.2	20	144	82	83	7806	061	7806	061	15.52	Admission	1	Positive	Negative	Negative
F	31	3	37.6	20	155	114	94	78900	78900	5409	78900	2.1	MBD	0
F	66	3	38.7	20	179	105	96	061	486	061	486	1.95	MBD	1	Positive	Negative	Negative
M	9	3	38.9	20	98	60	115	463	463	2765	463	36.85	Admission	2
F	41	4	36.8	18	132	95	67	7821	061	7821	061	2	MBD	5	Positive	Positive	Negative
M	24	3	37.7	20	142	71	107	7806	7806	7806	5409	70.68	MBD	0	Negative	Negative	Negative
M	8	3	38.8	20	117	82	122	92303	92311	92311	81220	3.97	MBD	3	Positive	Negative	Negative
M	80	3	38.7	20	147	77	84	061	78900	7806	061	5.13	MBD	1	Positive	Negative	Negative
F	61	3	38.5	20	140	89	102	7291	7804	4279	4019	19.68	Admission	3
F	30	4	36.9	20	120	77	109	7806	7806	061	7806	1.63	MBD	2	Negative	Negative	Negative
F	69	3	38.4	18	165	83	69	7806	7806	061	061	6.43	AAD	3
M	58	2	36.7	20	81	48	48	78650	41071	78650	5920	6.75	Admission	7
M	88	3	37.8	20	116	76	90	6829	6829	6829	061	16.1	Admission	0	Positive	Positive	Positive
M	75	4	36.7	18	149	62	62	061	7806			2.35	MBD	3	Negative	Negative	Negative
F	31	3	37.6	20	164	104	81	7806	061	7806	061	3.62	MBD	2	Positive	Negative	Negative	6
F	56	3	36.3	20	133	76	67	92232	1541	78900	1541	2.5	MBD	0
M	36	4	37.2	20	134	102	102	7806	061	7806	061	1.3	MBD	4
F	58	3	38.3	20	149	81	90	7806	7806	061	7806	39.02	Admission	1	Negative
F	55	3	38	18	125	76	97	41071	41071	41519	41071	3.03	MBD	1	Positive	Negative	Negative
F	39	3	38.1	18	124	86	105	7806	061	7806		2.55	MBD	2
M	15	4	36.9	18	130	90	111	7806	7806	7806	061	5.08	MBD	3	Positive	Positive	Negative
M	52	3	39	18	133	85	111	7806	7806	061	061	1.77	MBD	3
F	35	3	37.6	18	109	76	86	92420	7806	7804	7806	3.88	MBD	1	Positive	Negative	Negative	7
M	53	3	39	18	124	79	98	7806	061	25000	4019	1.47	MBD	1	Positive	Negative	Negative
F	43	3	38.8	20	187	126	123	92400	2967	2967	2967	3.77	MBD	1	Positive	Negative	Negative
M	36	3	39.7	18	133	85	107	4660	4660	92321	9140	6.45	MBD	2	Positive	Negative	Negative
M	15	3	38.7	20	118	78	105	2875				4.02	MBD	3
F	41	3	38.2	20	117	71	104	061	7806	7862	7804	4.82	MBD	1	Negative	Negative	Negative
M	73	3	36.8	20	128	92	84	061				1.85	MBD	5	Positive	Negative	Negative
F	18	3	38.3	19	125	86	110	5589	462	061	462	2.35	MBD	2	Positive	Negative	Negative
F	83	3	38.1	20	114	71	100	2875	4019	2875	4019	2.67	Admission	1
F	38	3	39.3	20	113	65	138	7806	061	7806		3.75	MBD	1	Positive	Negative	Negative	7
F	71	3	39.8	20	156	73	120	78009	4019	78009	4019	21.47	Admission	1	Positive	Negative	Negative	7
F	56	2	38.8	20	172	79	74	8748	7806	25000	7806	53.78	AAD	2	Positive	Negative	Negative
M	88	1	35.1	20	102	59	132	5789	5789	78550	5789	1.92	Admission	0
F	21	3	38.4	20	124	66	109	7806	78701	7806	78701	3.52	MBD	3
M	10	3	37	23	105	69	116	061	78900			4.03	MBD	4	Negative	Negative	Negative
F	46	3	37.3	20	190	159	68	7804	78900	5750	7895	45.92	Admission	0
F	75	3	36.7	20	140	68	97	92400	8208	8208	7806	9.9	Admission	1
M	8	4	36.7	20	140	68	97	78900	53500			2.52	MBD	1	Positive	Negative	Negative
F	9	3	38.9	26	111	94	121	462	462			3.72	MBD	1	Positive	Negative	Negative
F	7	4	36.8	22	112	81	80	061				23.28	MBD	2	Positive	Positive	Negative
M	74	2	40.7	24	146	88	136	7806	7802	41401	7806	25.05	Transfer	1	Positive	Negative	Negative
F	49	3	38.5	20	108	74	82	7806	7806	061	061	4.87	MBD	3	Positive	Negative	Negative
F	58	3	38.5	18	164	96	85	87340	87343	5212	7806	23.12	MBD	2	Positive	Negative	Negative	6
M	23	3	37.1	20	146	101	85	92411	92420	92320	92321	3.17	MBD	2
F	60	3	39	18	147	76	83	7806	061	25000	4019	2.67	AAD	1	Positive	Negative	Negative
F	58	3	38.5	20	163	92	93	061	061	061	78701	2.12	MBD	1	Positive	Negative	Negative
M	62	2	39.4	20	167	55	87	5589	6089	585	6089	13.07	MBD	1	Positive	Negative	Negative
M	74	3	38	18	139	85	88	78900	78900	1625	78900	2.35	MBD	1	Positive	Negative	Negative	8
F	44	3	37.5	18	140	78	77	78900	78900	7806	061	16.8	Transfer	5
M	58	3	38.6	20	163	109	119	7806	41401	25000	4019	4.7	MBD	1	Positive	Negative	Negative
F	37	3	39.3	20	103	69	86	7806	061	061		3.25	MBD	2	Positive	Negative	Negative
M	27	4	36.3	20	122	82	90	7806	7806	7080	061	3.38	MBD	3	Negative	Positive	Negative
M	82	3	39.3	20	174	84	105	78650	78650	496	4019	3.35	MBD	1	Positive	Negative	Negative	6
F	48	3	39	20	138	86	107	78900	78900	2189	061	2.5	MBD	1	Positive	Negative	Negative
F	67	3	39.8	24	139	71	105	061	7806	061	7806	8.17	MBD	2	Positive	Negative	Negative
F	30	4	37.1	20	138	87	80	78900	78900	78900	5589	2.17	MBD	1	Negative	Positive	Positive
M	36	3	39.4	24	109	68	100	7806	7806	061	061	2.5	MBD	2	Positive	Negative	Negative	7
F	55	3	38.8	20	125	64	114	53081	78900	53081	78900	4.6	MBD	1	Negative	Negative	Negative
F	76	3	39.1	24	170	87	98	4010	4010	4010	4019	16.87	MBD	1	Negative	Negative	Negative
F	60	3	37.7	20	135	88	124	061	5789	7806	061	4.48	Admission	4	Positive	Positive	Negative
F	8	4	39.6	24	105	75	127	46619	46619	49390	49390	2.03	MBD	3	Positive
M	73	3	39.2	20	139	89	119	78701	5589	061	7806	6.42	MBD	2	Positive	Negative	Negative	3
M	58	3	36.9	20	146	95	109	7806	5715	6829	7806	28.98	Admission	5	Negative	Negative	Negative
F	63	3	39.8	18	156	82	116	7806	7806	4019	7140	9.08	MBD	2
F	70	3	39	20	158	95	113	1514	1514	7806	1514	1.92	MBD	1	Positive	Negative	Negative
M	19	4	39.2	16	129	69	94	7806	061	7806		2.47	MBD	1	Positive	Negative	Negative
M	86	3	38	18	100	51	69	7806	7806	2948	7806	7.77	MBD	2	Positive	Negative	Negative
M	36	3	38.4	20	140	97	115	061	7806			2.82	MBD	1	Positive	Negative	Negative	7
M	78	2	39	24	147	86	79	92420	7806	51881	7806	5.5	Admission	1	Positive	Negative	Negative	4
M	93	3	38.6	22	118	70	81	7863	5789	5789	5789	25.42	Admission	1	Negative	Negative	Negative
F	49	4	37.8	20	153	98	78	7806	061	061	7806	1.97	MBD	1	Positive	Positive	Positive
M	44	3	38.3	20	131	90	113	061	25000	061	25000	4.23	MBD	1	Positive	Negative	Negative
M	64	3	39.7	20	122	73	100	7806	5990	0389	061	3.25	Admission	1
M	41	3	38.4	20	137	92	101	7806	061	061	7806	1.53	MBD	1	Positive	Negative	Negative	6
M	49	3	38.5	20	122	82	103	7806	061	7806	061	3.13	MBD	1	Positive	Negative	Negative
F	69	3	38.8	20	151	90	104	78609	1623	78609	1623	26.67	MBD	1	Positive	Negative	Negative	8
F	64	3	39.5	20	142	85	92	061	7806	7804	7806	57.63	MBD	1	Positive	Negative	Negative	8
F	29	3	36.7	20	149	97	116	5990	061	061	061	5.78	MBD	2	Negative	Negative	Negative
F	47	3	37.6	20	98	73	97	5589	7806	061	061	14.77	Transfer	0
F	37	3	39.6	20	105	80	109	5589	78900	78900	78900	1.87	MBD	2	Positive	Negative	Negative	4
F	20	3	39.2	20	127	85	101	6253	7806	061	7806	1.98	MBD	3	Positive	Negative	Negative
F	58	3	36.8	20	136	99	71	5929	061	59010	5929	14.33	Admission	4	Positive	Positive	Positive	5
M	16	3	38.3	18	132	91	91	462	463	3829	462	2.85	MBD	2	Positive	Negative	Negative
F	76	3	39.2	20	156	63	118	7806	5839	25000	4019	11.72	MBD	1	Negative	Negative	Positive
M	32	4	37.7	20	136	81	106	7806	78900	061	7806	2.18	MBD	0	Positive	Negative	Negative	7
M	59	3	38	20	160	104	114	9351	7806	061	7806	2.58	MBD	3	Positive	Negative	Negative
F	92	3	38.3	20	191	90	87	7806	7806	49390	7140	2.63	MBD	1	Positive	Negative	Negative
M	15	3	39.6	20	124	82	127	462				3.52	MBD	1	Positive	Negative	Negative
F	47	3	39.5	20	137	69	111	061	7806	061	7806	1.57	MBD	1	Positive	Negative	Negative
F	11	3	39	24	113	82	97	5589	7821	5589	7821	25.63	MBD	1	Positive	Positive	Positive	6
M	69	4	36.9	20	113	68	101	7802	7802	7802	25000	1.8	MBD	2	Positive	Negative	Negative
F	61	3	39.1	20	162	89	109	7806	25000	7806	25000	5.32	Admission	1	Positive	Negative	Negative	8
F	24	3	38.2	20	112	89	107	7806	7806	78701	463	2.03	MBD	2
F	61	3	38.2	20	112	89	107	78900	78900	7806	78900	5	MBD	2	Positive	Negative	Negative
F	15	4	37.3	20	115	87	80	061	061	53500	061	2.85	MBD	3	Positive	Negative	Negative
F	31	4	37.2	18	120	84	90	33390	1830	33390	061	2.48	MBD	3	Positive	Positive	Negative
F	49	3	38.6	20	117	73	124	7806	7840	061	7806	3.4	MBD	2	Negative	Positive	Negative
F	37	3	39	20	135	85	108	7806	7806	061	061	3.08	MBD	1	Positive	Negative	Negative	6
M	66	3	38	18	123	82	84	7806	7806	061	7806	5.77	Transfer	1	Positive	Negative	Negative	8
F	6	3	40.2	22	112	71	145	53500	462	061		3.2	MBD	1	Positive	Negative	Negative
M	46	3	39.8	20	106	61	80	92311	8409	061	7806	2.02	MBD	1	Positive	Negative	Negative
M	59	3	39.2	19	146	109	133	7806	061	061	7806	2.27	MBD	1	Positive	Negative	Negative
M	8	3	38.7	20	106	70	101	2765	53500	485	2765	6.43	Admission	5
F	46	3	38	18	143	89	97	061	061			3.27	MBD	2	Positive	Negative	Negative
M	7	3	40.2	26	112	62	141	5589	5589	5589		19.83	Admission	1	Negative
F	51	3	39.4	18	159	106	98	86800	86800	9229	9221	2.02	MBD	2	Positive	Negative	Negative
F	79	3	39	18	144	79	106	95901	7804	25000	4019	5.82	MBD	1	Positive	Negative	Negative
M	72	3	37.1	20	112	64	53	7806	7806	061	7806	9.08	AAD	0
F	57	3	39.8	19	129	80	125	7806	7806	061	061	14.7	MBD	1	Positive	Negative	Negative
M	11	3	39	20	144	93	132	7806	7806	061		3.3	MBD	1	Positive	Negative	Negative
M	56	3	39	20	146	93	111	2740	4019	7806	061	2.82	MBD	2	Positive	Negative	Negative
M	59	3	36.7	14	101	66	56	4111	4111	25000	41071	50.55	Admission	0
F	25	3	37.5	20	108	75	90	78701	78701	78701	7840	6.55	MBD	0	Negative	Negative	Negative
M	5	4	38.3	24	105	74	144	7806	7806	95901	87340	4.08	MBD	1	Positive
F	44	3	38.7	20	117	73	111	7806	7806	061	061	0.6	MBD	2
M	43	3	37.4	20	107	75	86	7242	7242	7806	7806	3.17	MBD	3
M	82	3	38.3	24	133	76	79	7806	4389	4019	2875	40.02	Admission	1	Negative	Negative	Negative
M	51	3	37	20	155	91	95	5789	5789	061	5789	42.85	MBD	0
F	30	3	38	20	115	71	107	061	7806	061	78701	2.55	MBD	3	Positive	Negative	Negative
M	44	3	38.9	22	146	97	131	78900	78900	78900	4556	6.1	MBD	1	Positive	Negative	Negative	6
F	57	3	38.7	20	183	116	98	78900	1629	78900	1629	13.97	MBD	1	Positive	Negative	Negative	6
M	49	3	38.7	20	183	116	98	7806	1479	7806	1479	2.77	AAD	1	Negative	Negative	Negative
M	78	2	35.9	20	81	51	56	78550	25000	78550	25000	19.75	MBD	0
M	70	3	38	20	176	109	91	7895	7895	7895	7895	17	Admission	2
F	57	3	38.4	20	154	90	90	061	061			1.75	MBD	3	Positive	Negative	Negative
F	73	3	38.5	20	177	118	102	7806	25000	4019	486	22.7	Admission	1
F	23	3	36.6	20	110	63	76	78900	2765	78900	2765	11.1	MBD	3	Negative	Negative	Negative
M	82	2	37.9	20	83	45	76	7806	78550	7806	061	8.4	Admission	1	Positive	Negative	Negative
M	5	3	39.8	20	121	85	135	5589	2765	5589	2765	5.37	MBD	1
F	39	1	37.2	24	126	84	91	7802	5990	78009	78900	3.83	AAD	0	Positive	Negative	Negative
F	45	3	39	20	148	80	115	061	7806			4.9	MBD	1	Negative	Negative	Negative
F	46	3	38.5	18	124	75	90	78900	78791	2859	4660	3.33	MBD	2
F	49	3	39.1	20	133	86	85	38619	4019	061	061	3.53	MBD	1	Positive	Negative	Negative
F	45	4	36.9	20	158	111	78	7840	5997	5990	5997	26.42	MBD	2	Positive	Positive	Negative
M	81	3	37.2	20	122	49	81	7806	5640	78900	5990	2.62	MBD	1	Positive	Positive	Negative	3
M	63	3	38.6	18	178	98	72	7806	7806	78900	7806	4.43	MBD	1	Positive	Negative	Negative
F	30	3	38.5	18	115	73	89	78900	7840	95901	7840	6.85	MBD	1	Positive	Negative	Negative	7
M	11	3	38.5	18	115	73	89	53500	87340	53500	53500	3.15	MBD	1	Positive	Negative	Negative
M	41	3	39.3	22	107	66	140	7806	29550	061	7806	2.7	MBD	3	Positive	Negative	Negative
F	74	3	39.2	20	155	134	76	7806	25000	4019	061	3.08	MBD	0	Positive	Negative	Negative
M	64	4	37.7	18	125	79	95	7804	061	7806		1.35	MBD	7	Positive	Positive	Negative
F	53	3	39.4	19	131	76	104	7806	7806	061	7806	2.65	MBD	1	Positive	Negative	Negative
F	5	3	39.8	24	106	74	166	5589	0740			11.43	MBD	2	Negative	Negative	Negative
F	79	3	38.8	20	172	90	131	36012	7806	7806	061	3.98	MBD	1	Positive	Negative	Negative	4
F	4	4	37.7	20	113	81	111	462	7821	462	7821	2.85	MBD	4	Positive	Negative	Negative
F	65	3	37.5	18	178	115	108	061	1479	061	1479	2.7	MBD	0	Positive	Positive	Positive
M	67	3	37	20	128	83	80	7804	78900	7841	7804	4.3	MBD	0	Positive	Positive	Positive
M	71	3	39.5	20	147	61	80	7806	25000	4019	061	12.03	MBD	1	Positive	Negative	Negative	5
M	33	3	38.5	20	109	69	105	7806	061	061	7806	5.05	MBD	1
M	81	3	37.8	20	192	97	71	42731	4280	25000	4019	7.57	MBD	2	Positive	Negative	Negative	4
M	27	3	39.4	20	111	70	123	7806	7806	7806	5733	6.07	Admission	7
M	13	3	38.1	20	111	69	117	5589	061	061	061	0.42	MBD	1	Positive	Negative	Negative	6
M	55	3	39	24	182	110	147	7806	061	7806	061	1.6	MBD	2	Positive	Negative	Negative
F	80	3	37.1	20	140	67	87	9233	53190	25000	53190	9.38	Admission	0
M	44	3	38.6	20	132	97	115	7806	7806	061	061	2.37	MBD	2
M	63	4	37.7	20	135	88	86	4558	061	4558	061	27.25	MBD	2	Positive	Negative	Negative
M	62	3	38.8	24	155	85	119	5589	1533	5589	061	2.03	MBD	2	Positive	Negative	Positive
M	46	4	37.8	24	145	102	104	7806	061	7806		2.75	MBD	2	Positive	Negative	Negative	6
F	55	3	38.8	18	192	99	116	7806	25000	4019	7806	21.6	MBD	3	Negative	Negative	Negative
M	60	3	39.2	20	152	90	107	7802	7802	95901	7802	2.32	MBD	1	Positive	Negative	Negative	6
F	26	3	38.4	19	162	98	105	7806	061	7806		2.9	MBD	1
F	3	3	38.7	28	91	52	166	5589	5589	5589	2765	14.63	MBD	1	Negative	Negative	Negative
M	9	3	39.1	22	136	89	133	7821	1919	7821	6829	3.42	MBD	1
F	68	3	38.1	20	137	94	110	7806	7100	7806	061	3.22	MBD	3	Positive	Negative	Negative
M	23	3	38	18	136	90	121	061	7806	4878	7806	5.85	MBD	1	Negative	Negative	Negative
M	74	3	38.6	20	135	90	96	7806	7211	6009	25000	4.83	MBD	1	Positive	Negative	Negative	7
F	60	3	37.9	20	156	99	104	78900	78900	1749	1749	3.97	MBD	2		Negative	Negative
M	67	3	37.5	20	132	87	85	4270	4270	4270	7851	2.32	MBD	3	Positive	Negative	Negative	7
M	21	3	39	20	119	77	135	061	7806	061	7806	1.38	MBD	1	Positive	Negative	Negative
F	24	3	37.5	20	126	81	74	37230	78900	7806	78900	1.78	MBD	3
M	22	3	39.8	20	128	67	132	061	7806			5.43	MBD	1	Positive	Negative	Negative	6
M	31	3	38.9	18	120	77	110	7806	061	7806		3.32	MBD	1	Positive	Negative	Negative	6
M	59	3	38.7	20	157	99	107	1459	1459	061	1459	4.53	MBD	1	Positive	Negative	Negative
M	74	3	39.3	20	137	76	88	5283	5283	5283	78900	2.32	MBD	1	Positive	Negative	Negative	6
F	60	3	36.8	20	128	67	78	7806	061	7806	061	3.83	MBD	5	Positive	Positive	Positive
M	55	3	39.3	18	129	71	89	061				1.67	MBD	1	Positive	Negative	Negative
M	80	3	39.5	18	129	71	89	7806	4660	4019	7806	4.17	MBD	1	Positive	Positive	Negative	4
F	80	3	37.8	20	156	61	88	7851	25000	7851	25000	2.42	MBD	1	Positive	Negative	Negative	3
M	27	3	38.6	16	131	87	92	7806	061	061	7806	2.75	MBD	1	Positive	Negative	Negative
M	62	3	37	20	161	101	70	53500	53500	061		4.03	MBD	0	Positive	Positive	Positive
M	28	3	38.2	20	145	68	82	061	042	7806	49390	3.52	MBD	1	Positive	Negative	Negative
F	23	3	39.6	20	115	69	116	V596	061	7806	061	3.38	MBD	2	Positive	Negative	Negative
M	89	3	36.4	20	99	53	82	78609	78609	78609	5789	11.25	Admission	0	Negative	Negative	Negative
M	4	3	37.6	26	118	70	150	5589	462	5589	7806	9.27	MBD	1	Negative	Negative	Negative
M	25	3	39	20	137	87	111	8208	8900	8900	8900	1.4	MBD	2	Positive	Negative	Negative
F	33	3	38.2	18	120	76	98	7806	7806	5733	7806	6.97	Admission	1	Positive	Negative	Negative
F	35	3	37.9	18	120	76	98	061				3.77	MBD	5
F	61	3	38.3	20	122	70	94	7806	7804	061	7806	3.1	MBD	1	Positive	Negative	Negative	5
M	45	3	37.7	20	150	96	119	061	061	7806	061	17.25	MBD	1	Positive	Negative	Negative	8
M	49	3	39.3	24	142	94	113	78900	78900	78052	7804	13.83	MBD	1
M	28	3	36.8	18	121	80	93	46430	46430	061		6.5	MBD	0	Positive	Negative	Negative
M	31	3	38.7	20	132	80	104	7806	7806	061	7806	15.13	MBD	3
F	62	3	39.7	20	136	79	126	6826	78900	78900	9245	11.3	MBD	1	Positive	Negative	Negative
M	74	3	36.9	20	127	69	86	061	061	061	78900	48.37	Admission	2	Positive	Negative	Negative	5
F	24	3	38.7	19	105	68	122	78820	78820	5990	78820	1.48	MBD	1	Positive	Negative	Negative
F	59	2	39.3	18	161	104	121	7806	585	061	7806	3.87	MBD	2	Positive	Negative	Negative
M	39	3	38.1	24	136	97	96	7806	061	7806	061	5.33	MBD	2	Positive	Negative	Negative	8
F	34	3	39.7	18	157	71	140	7080	9951	7806	4878	65.42	MBD	1	Positive	Negative	Negative	8
F	34	3	39.5	20	117	70	94	061	061	2761	2875	2.05	MBD	1
F	62	3	38	18	111	71	92	5589	061	5589	061	3.13	MBD	1	Positive	Positive	Negative	4
F	67	3	37.1	20	132	77	73	7804	7806	25000	4019	4.55	MBD	3	Positive	Negative	Negative	8
F	25	3	38.5	18	106	70	97	78900	7806	061	7806	2.45	MBD	3	Positive	Negative	Negative	6
F	17	3	39.5	20	117	67	148	78900	78900	53500	53500	3.78	MBD	1	Positive	Negative	Negative
M	67	3	38.8	20	149	84	113	7806	7806	2875	7806	2.83	MBD	1	Positive	Negative	Negative	5
F	53	3	38.4	18	145	87	112	061	2859			2.38	MBD	0	Positive	Negative	Negative
M	16	4	37.2	20	129	89	90	061	061	2765		2.88	MBD	1	Positive	Positive	Negative
F	23	3	39.5	20	117	80	140	92411	53500	7806	7806	5.32	MBD	1	Positive	Negative	Negative	7
F	69	3	38.3	18	190	85	76	7806	7806	061	061	2.2	MBD	1	Positive	Positive	Negative
F	71	3	38.8	19	160	77	76	78900	4019	55090	78900	2.02	MBD	1	Positive	Positive	Positive
F	31	3	39.1	18	141	89	136	7806	7806	061	061	2.2	MBD	1	Negative	Negative	Negative	6
F	36	3	37.1	18	108	73	79	7806	7806	7806	061	11.3	MBD	3
M	25	4	36.9	20	137	87	83	061				7.1	MBD	3
M	35	3	39.2	20	131	88	128	7806	7806	061	061	2.4	MBD	2	Positive	Negative	Negative
F	35	3	38.5	20	119	74	133	5589	5589	5589	7806	3.32	MBD	2	Positive	Negative	Negative
F	44	3	38.7	18	143	88	138	061	4659	061	4878	7.48	MBD	1	Negative	Negative	Negative
M	65	3	39.7	20	148	100	128	7806	7806	4019	78820	3.58	MBD	1	Positive	Negative	Negative
F	24	3	37.8	20	113	67	109	683	7806	061	061	20.38	MBD	2	Positive	Negative	Negative
M	29	3	39.2	18	113	61	120	7806	061	061	7806	1.8	MBD	1	Positive	Negative	Negative	7
M	62	4	39.4	16	129	76	76	7804	7804	7804	25000	1.92	MBD	1	Positive	Negative	Negative
M	24	3	39.6	20	135	77	124	78900	7806	7806	7806	2.45	MBD	1	Positive	Negative	Negative	7
M	77	3	39.4	20	115	59	102	4019	7806	7806	4019	18.72	Admission	1	Positive	Negative	Negative
F	68	4	36.5	18	114	72	88	5839	5839	43401	6829	2.65	MBD	2	Positive	Positive	Positive
F	23	3	38.5	18	116	69	127	7806	7806	7806	061	1.37	MBD	1	Positive	Positive	Negative
M	27	3	39.4	20	144	80	130	7806	061	7806	7847	4.15	MBD	2	Positive	Negative	Negative	8
M	78	3	37.7	18	165	66	63	061				1.8	MBD	1	Positive	Negative	Negative	6
M	80	3	37.5	20	154	86	102	7804	4019	7804	4019	4.95	AAD	0	Positive	Negative	Negative
M	58	1	38	26	74	46	99	95901	95901	87340	95200	28.93	Admission	7	Negative	Negative	Negative
F	48	3	38.1	20	122	66	103	4270	7880	7880	78900	2.85	MBD	1	Positive	Negative	Negative
F	77	2	38.7	20	216	99	105	78791	7804	7804	4010	91.25	Admission	2
F	21	4	37.6	18	133	91	83	95901	87340	95901	061	2.6	MBD	1	Positive	Negative	Negative	5
M	32	4	37.7	18	106	78	86	92411	7806	061	7806	3.43	MBD	3	Positive	Negative	Negative
M	31	3	39.1	20	126	81	101	061				3.17	MBD	1	Positive	Negative	Negative
M	55	3	38.8	18	113	73	116	78900	1550	1550	1550	30.47	MBD	2	Positive	Negative	Negative	6
F	76	3	38.3	20	141	50	78	7806	7804	061	061	3.57	MBD	6	Positive	Positive	Positive
M	21	4	36.2	16	134	63	76	92411	061	7806	061	0.87	MBD	1	Positive	Negative	Negative
M	31	3	39.2	20	117	79	96	7806	061	7806	061	5.98	MBD	1	Positive	Negative	Negative
M	48	3	39.2	20	131	73	116	061	7806			1.3	MBD	2	Positive	Negative	Negative
M	30	3	36.7	18	126	83	69	061	7806	061		2.13	MBD	2	Negative	Negative	Negative	3
M	45	3	39.1	18	133	90	118	8860	9221	83104	8860	3.68	MBD	1
F	70	3	39.7	20	132	80	109	8820	7806	7806	7806	1.23	MBD	1	Positive	Negative	Negative
F	23	3	39.2	18	142	93	120	7806	061	7806		1.73	MBD	1	Positive	Negative	Negative
M	32	3	38.4	20	167	122	122	4659	7806	4659	7806	2.47	MBD	2	Negative	Negative	Negative
M	32	4	38.8	16	110	80	98	8798	061	7806		3.75	MBD	1	Negative	Negative	Negative
M	64	3	39.5	18	108	85	133	937	7806	061	061	44.57	Admission	2	Negative	Negative	Negative
M	73	2	37.9	28	107	68	144	38619	25000	4019	78609		Admission	1	Positive	Negative	Negative
F	43	3	37	20	149	96	109	9779	9779	2768	486	2.48	MBD	5
M	21	3	39.5	20	126	75	91	8020	061			3.92	MBD	1	Positive	Negative	Negative
F	4	3	36.8	20	127	92	134	78701	5589	2765	462	3.77	MBD	5	Positive	Positive	Negative
M	60	3	36.2	20	101	67	65	41071	41071	25000	4019	3.75	MBD	1	Positive	Positive	Negative
F	18	3	38.6	20	136	95	123	7089	92231	061	061	2.12	MBD	1	Positive	Negative	Negative
M	56	3	38.6	18	115	64	80	6929	6820	6820	7806	46.82	MBD	2
M	24	3	39.2	20	131	79	116	5589	7806	78900	78900	4.13	MBD	1
M	54	4	39.2	20	131	79	116	9351	9351	7806	7806	1.68	Admission	1
F	20	3	38.5	20	122	68	138	8910	7890	7890	7890	1.3	MBD	1	Positive	Negative	Negative
M	53	3	39.4	20	164	115	109	7806	061	4019	7806	3.5	MBD	1	Positive	Negative	Negative
M	35	3	37.4	20	195	135	116	5789	5789	061	5789	2.47	MBD	0	Negative	Negative	Negative
F	45	3	38.1	20	147	77	116	7806	585	4019	38610	12.2	MBD	1
F	34	3	38	20	140	83	80	061	061	2859	061	3.52	MBD	1	Negative	Negative	Negative
F	58	3	37.1	20	127	93	107	7804	7804	7806	4659	8.87	MBD	4	Positive	Negative	Negative	7
F	62	4	37.1	18	152	81	66	7806	061	7806	061	3.13	MBD	1	Positive	Negative	Negative
M	26	3	38.3	18	129	83	124	7806	061			1.6	MBD	1	Positive	Positive	Positive
M	44	4	38.5	16	159	122	96	9245	7806	7806	061	2.92	MBD	2	Positive	Negative	Negative
F	50	3	38.9	20	135	74	138	1742	1742	7806	061	2.9	MBD	1	Positive	Negative	Negative
F	32	3	38.1	20	119	73	79	061				1.52	MBD	4	Positive	Negative	Negative
F	67	4	38.6	20	136	79	90	53500	7806	061		2.97	MBD	1	Positive	Negative	Negative
F	63	3	39.4	20	147	99	116	1749	7806	6824	88003	3.98	MBD	1	Positive	Negative	Negative	7
M	36	3	38.6	18	144	96	107	061				2.03	MBD	2	Positive	Negative	Negative
M	30	3	38.7	20	158	102	123	78900	7806	061	061	1.97	MBD	1	Positive	Negative	Negative	6
F	43	3	39.4	20	118	74	95	78900	7806	7080	061	9.83	MBD	1	Positive	Negative	Negative	4
F	51	3	39.6	18	136	83	113	78900	5589	5990	5990	3.32	MBD	1	Positive	Positive	Negative
M	23	3	38.9	20	144	87	128	92411	9100	061	7806	3.57	MBD	1	Positive	Negative	Negative	6
F	54	3	39.6	20	160	82	63	42789	42789	78650	78609	3.25	MBD	2	Positive	Negative	Negative
F	84	3	38	81	117	73	87	5283	7863	7806		4.13	Admission	1	Positive	Positive	Negative
F	60	3	39.3	22	157	81	113	9213	061	7806		1.27	MBD	1	Positive	Negative	Negative
M	56	3	39.2	20	166	110	118	061	7806	061	7806	2.33	MBD	2	Positive	Negative	Negative
M	31	3	39.3	20	122	83	125	83100	7806	061	061	2.48	MBD	1	Positive	Negative	Negative
M	31	3	38.3	20	153	99	80	4659	463	061	7806	6.25	MBD	4	Positive	Negative	Negative	5
F	20	3	37.5	18	118	76	116	5990	061			2.27	MBD	1	Positive	Negative	Negative
F	36	3	39.4	20	120	87	121	7806	061	2869	7806	5.65	MBD	2	Negative	Negative	Negative
F	24	3	39	20	112	76	112	7806	061	7806		2.88	MBD	1	Positive	Negative	Negative
M	20	3	38.5	20	111	68	117	95901	92411	95901	92411	2.3	MBD	1	Positive	Negative	Negative	6
M	58	4	37.5	20	168	88	101	061	7806			3.05	MBD	1	Positive	Negative	Negative	7
M	2	3	38.3	22	120	71	107	46619	462	5589	5589	15.73	Admission	2
M	36	3	39.6	16	146	99	119	8830	8830	9556	8830	28.48	MBD	2	Positive
F	20	3	37.4	18	137	89	88	53391	53391	53081	78900	3.17	MBD	3	Negative	Negative	Negative
M	52	3	36.5	20	169	112	66	463	061	463		4.23	MBD	1	Positive	Positive	Positive
F	50	3	38.6	20	125	79	101	061				2.53	MBD	1	Positive	Negative	Negative
M	71	3	38.2	20	164	99	80	4556	5720	5720	5720	1.78	MBD	2	Positive	Negative	Negative
F	36	3	39.5	18	135	74	123	061				5.5	MBD	3	Positive	Negative	Negative	7
F	27	3	39	22	122	90	110	78900	78900	59010	7880	19.9	MBD	1	Negative
M	55	3	38.6	18	133	74	107	061	7806	061	7806	2.72	MBD	1	Positive	Negative	Negative
F	27	4	37.7	19	140	93	112	7806	4878	7806	38619	10.92	MBD	0	Negative	Negative	Negative	4
F	73	3	39.3	20	150	91	84	53500	53500	78900	53500	52.58	Transfer	1	Negative	Negative	Negative
M	2	3	38.3	22	96	66	143	2861	78900	53500	53500	2.27	MBD	4
F	52	4	37.8	20	176	96	104	7847	7847	4019	7806	2.57	MBD	2	Positive	Negative	Negative
M	20	3	39.8	19	117	62	133	7806	7806	061	061	3.27	MBD	1	Positive	Negative	Negative	6
F	26	3	38.5	18	136	92	109	7806	4640	061	4878	2.02	MBD	2
F	33	3	38	18	110	68	97	061	061			2.4	MBD	1	Positive	Negative	Negative	7
F	60	2	39	20	109	66	130	7806	1749	7806	1749	12.42	Admission	1	Positive	Negative	Negative
F	59	2	39.8	18	103	76	84	78262	78650	7862	78262	41	Admission	1	Negative	Positive	Negative
F	53	3	38	20	150	87	102	061	061			4.13	MBD	1	Positive	Positive	Negative
F	31	3	38.2	20	117	71	102	78900	7806	061	7806	2.05	MBD	2	Positive	Negative	Negative	7
M	25	3	38	24	138	85	123	7806	061	7806		2.73	MBD	2	Positive	Negative	Negative
F	32	3	40.3	20	108	69	132	4659	7806	7804	061	2.75	MBD	1	Positive	Negative	Negative
M	55	2	38.3	20	99	61	136	71976	71976	1629	71976	25.85	Admission	1
F	61	3	38.3	18	129	84	117	7806	7806	061	061	25.48	Admission	5
F	44	3	37.3	20	98	64	76	7806	4878	7806	061	3.45	MBD	2
F	70	3	38.9	20	133	86	114	7806	061	061	7806	2.23	MBD	1	Positive	Negative	Negative
F	80	4	37.2	19	149	96	104	7242				5.57	MBD	0	Positive	Positive	Positive
F	34	3	40.2	20	135	88	119	7806	7806	7806	061	5.87	MBD	2
M	74	3	38	18	150	90	116	7806	7806	5990	5990	5.65	MBD	1
F	4	3	38.1	28	90	70	122	920	95901	462	462	2.13	MBD	4
F	21	4	37.2	20	117	86	89	5589	8830	7806	7806	2.07	MBD	2	Positive	Positive	Negative
M	30	3	36.7	18	105	66	80	41011	41011	4275	38619	3.4	MBD	0	Positive	Positive	Negative
M	59	3	37.6	16	106	72	96	37230	5849	5849	78820	62.48	MBD	1	Positive	Negative	Negative
M	50	3	40.6	20	143	88	107	78701	7806	061	061	2.4	MBD	2	Positive	Negative	Negative
M	2	3	40.9	24	100	72	158	061	061	061	2765	25.33	Admission	1	Positive	Negative	Negative
F	21	3	38.5	20	120	85	92	4659	061	4659		3.15	MBD	4	Negative	Negative	Negative
M	47	3	39.2	20	134	73	111	7806	486	486	7806	11.25	Admission	4
F	70	3	37.6	20	119	74	90	7806	7806	78900	78701	2.58	Transfer	4	Positive	Positive	Negative
F	71	3	36.8	18	128	81	69	6819	061			1.73	MBD	1	Positive	Negative	Negative	5
F	2	3	39.4	24	123	69	120	53500	46619	463	463	3.82	MBD	1	Negative	Negative	Negative
F	28	3	38.1	20	140	84	107	7806	485	4878	7806	4.25	MBD	1	Positive	Negative	Negative
M	24	3	39.2	20	157	95	109	4878	7806	7806	061	61.85	Admission	2	Positive	Negative	Negative	8
M	15	3	39.3	25	108	77	120	5589	462	485	485	27.12	Admission	1
M	34	3	39	20	149	98	113	6829	061	6829	061	2.78	MBD	1	Positive	Negative	Negative
M	25	3	39.2	20	115	59	131	7841	7806	061	061	2.12	MBD	1	Positive	Negative	Negative
F	3	3	37.1	24	99	65	147	462	5990	485	462	2.23	Admission	3
F	43	3	37	18	108	69	69	4660	486	78609	4660	7.48	MBD	0	Negative	Negative	Negative
M	14	3	38.4	20	108	58	95	5997	462	5839	7806	5.57	Admission	2	Positive	Negative	Negative
F	65	3	39.5	20	140	73	131	78650	5589	1541	78650	3.95	MBD	1	Positive	Negative	Negative
M	63	3	39.8	22	155	88	113	6829	4019	6820	4019	21.07	MBD	1	Positive	Positive	Negative
M	24	3	38.6	18	141	85	91	061				1.52	MBD	1	Positive	Negative	Negative
M	28	3	39.2	18	124	73	96	7806	061	7806		2.9	MBD	1	Positive	Negative	Negative
M	78	3	38.9	20	111	70	91	95901	80300	95901	80300	26.2	MBD	1	Positive	Negative	Negative
M	58	3	39.4	20	126	79	97	8830	061	7806		2.65	MBD	2	Positive	Negative	Negative
M	23	3	39.1	18	145	79	102	53500	53500	7806	53500	2.92	MBD	1	Positive	Negative	Negative
F	67	3	38.8	20	116	65	136	25000	4019	78079	25000	4.67	MBD	1	Positive	Negative	Negative
F	54	3	38.2	18	142	82	94	7806	061	061	7806	3.93	MBD	1	Positive	Negative	Negative
M	64	3	38.2	22	123	85	111	43401	25000	4019	43401	1.85	MBD	1	Positive	Negative	Negative	7
M	19	3	39.5	20	120	70	77	061	7806	061	7806	1.68	MBD	1	Positive	Negative	Negative
M	23	3	38.7	18	112	65	82	9140	92411	061	7806	4.38	MBD	2	Positive	Negative	Negative
F	49	4	36.7	18	115	73	61	061				1.8	MBD	0	Positive	Positive	Negative
M	24	3	38	20	137	89	92	7806	5589	7806	5589	5.77	MBD	3	Positive	Negative	Negative	6
M	15	3	38.9	26	142	62	84	5589	5589	462	5589	2.92	MBD	4	Negative	Negative	Negative
M	4	3	38	20	126	90	129	95901	87340	462		3.55	MBD	3	Positive	Negative	Negative
F	6	4	37	24	114	68	114	92311	92311	462	462	2.15	MBD	2	Positive	Negative	Negative
F	22	4	37.3	20	138	85	87	7806	061	7806		1.33	MBD	5
F	50	4	37.7	20	157	89	82	7840	7806	7840	061	1.5	MBD	1	Positive	Negative	Negative
M	58	3	38.9	20	169	100	113	6829	25000	6829	25000	3.17	MBD	1	Positive	Negative	Negative
F	2	3	38	24	102	64	130	462	462	462	061	3.67	MBD	2	Positive	Negative	Negative	6
F	19	3	38.6	18	116	59	93	78701	78701	7806	486	1.58	MBD	1	Positive	Negative	Negative
M	55	3	38	20	146	90	90	95901	8409	9221	86121	18.3	MBD	1	Positive	Negative	Negative	8
F	74	3	39.2	20	147	80	105	920	7806	49390	061	11.13	MBD	1	Positive	Negative	Negative	6
M	29	3	38.7	18	115	80	91	061	7806	061	2875	4.18	MBD	4
M	35	4	37.1	19	161	120	94	7863	4019	7089	061	2.32	MBD	7	Positive	Positive	Positive
M	17	3	37.5	30	115	100	140	7089	462	5589	462	3.1	MBD	1
F	52	3	38.1	24	137	95	140	7806	1745	7806	1745	7.32	MBD	1	Positive	Negative	Negative
M	61	3	37	20	110	88	118	7806	1629	7806	1629	55.58	Admission	3
M	79	3	38.8	20	164	81	84	061	061	4659	061	2.25	MBD	2	Positive	Negative	Negative
F	75	3	38.8	20	164	81	84	7806	9221	41401	4019	9.98	MBD	3	Positive	Negative	Negative
M	35	3	38.8	20	157	107	92	5589	2765	7806	061	3.03	MBD	2	Positive	Negative	Negative	6
M	12	4	37.2	20	112	79	78	53500	061	061		2.93	MBD	3	Positive	Negative	Negative
M	29	3	40	20	153	102	126	061				2.62	MBD	1	Positive	Negative	Negative
F	48	3	40	20	153	102	126	061				2.38	MBD	1	Negative	Negative	Negative
F	39	3	37.9	20	106	68	108	7806	78900	7806	78900	17.78	MBD	0	Positive	Negative	Negative
M	27	3	36.4	20	105	67	64	3331	061			7.92	MBD	0	Negative	Negative	Negative
M	23	3	39.1	18	121	83	94	061				2.65	MBD	2	Positive	Negative	Negative
M	75	4	37.4	19	158	88	82	7806	061	7806	061	3.02	MBD	4	Positive	Negative	Negative	4
M	27	3	37.1	20	128	88	74	4659	78609	4659	7806	27.55	MBD	0	Positive	Negative	Negative	7
F	33	3	39.4	20	105	66	119	7806	7806	061	061	2.13	MBD	2	Positive	Negative	Negative
F	27	3	38.9	18	104	73	94	9351	7872	7872	061	1.58	MBD	1	Positive	Positive	Negative
F	25	4	37.3	18	140	103	85	37200	7806	7806	5997	3.65	MBD	1	Negative	Negative	Negative
F	56	4	37	20	125	70	64	7806	7840	061	7806	2.68	MBD	3	Positive	Negative	Negative
F	24	4	39	16	135	115	117	78900	5589	7806	7806	1.63	MBD	1	Positive	Negative	Negative
F	39	3	39.1	18	146	117	98	061	7806	061	7806	2.77	MBD	1	Positive	Negative	Negative	7
M	50	3	38.7	20	125	82	107	7806	7806	5733	7806	19.37	Admission	4
F	21	3	38.7	20	109	64	94	4659	78701	7806		2.85	MBD	1
F	20	4	37.2	16	107	69	72	88102	88102	061		23.33	MBD	0
M	35	2	38.5	20	77	47	134	78550	7806	78550	7806	23.45	Admission	3
F	64	3	39.1	20	126	94	94	7806	1541	7806	1541	13.33	MBD	1
M	17	3	38.1	20	126	94	94	462	9115	462	9115	2.27	MBD	3
M	39	3	38.5	20	138	100	93	4878	7806	061	7806	2.22	MBD	2	Positive	Negative	Negative
F	24	3	38	20	105	66	68	4878	4878	7806	061	3.82	MBD	3
F	29	3	40	18	120	71	116	061	7806	061	7806	10.77	MBD	1	Positive	Negative	Negative	6
M	27	3	39.1	20	120	72	100	3229	7806	78650	3229	93.28	MBD	0
M	39	4	38.9	20	142	94	90	7806	7806	2875	061	2.3	MBD	3
F	25	2	36.5	18	106	70	50	37142	4659	7806	7802	30.12	MBD	0	Positive	Negative	Negative	6
F	2	3	38.9	26	106	68	147	4660	462	4660	2765	3.38	Admission	2
M	35	3	38.3	20	105	72	93	4878	7806	3499	4878	2.43	MBD	2
M	31	3	39.1	20	154	101	132	49390	7806	496	7806	2.6	MBD	1	Positive
M	32	4	38.2	20	120	81	96	7806	7806	061	061	1.83	Admission	2
M	49	3	38.8	20	165	89	91	7806	7806	7806	2875	29.15	Admission	1
M	5	3	36.6	20	125	85	111	462	061	462	061	14.7	Admission	5
F	23	3	38.2	20	101	65	75	7806	061	7806	061	2	Transfer	3
F	33	3	38.7	20	131	75	113	7806	7806	061	061	15.42	MBD	1
M	52	3	36.8	20	147	93	123	486	486	486	4920	37.43	MBD	1	Positive	Negative	Negative
M	29	3	39.1	20	133	82	113	061	7806			2.68	MBD	1	Positive	Negative	Negative	7
F	65	3	36.9	20	125	73	87	7806	7806	061	7806	3	MBD	4
M	64	3	39.5	24	158	78	131	7806	486	7806	486	76.1	Admission	3
M	33	3	37.5	18	103	70	74	7806	5589	061	7806	8.65	Admission	7	Positive	Positive	Negative	7
F	33	3	38.7	20	116	83	103	7806	061	061	7806	3.8	MBD	3
M	36	3	38	18	98	71	99	7806	49390	4640	7806	15.67	MBD	3
M	23	4	36.5	20	128	83	74	7806	061	061	7806	1.88	MBD	3	Negative	Positive	Positive
F	19	3	38.7	20	127	67	113	7806	7806	061	7806	6.97	MBD	2
M	40	4	37.4	18	111	86	122	92720	061	78701	061	2.82	MBD	2	Positive	Positive	Negative
F	34	3	37.1	20	113	73	108	38619	38619	7851	38619	2.28	AAD	1
M	85	4	37.6	18	136	72	100	061	7806	061	7806	40.5	Admission	1	Positive	Negative	Negative
M	43	3	39.1	20	185	130	109	7806	7806	5733	061	21.77	Admission	6
F	21	3	38.4	18	110	66	121	7806	7806	4878	7806	17.77	MBD	1
M	34	4	37.5	18	106	68	93	7806	7806	5990	7806	3.48	MBD	1
M	21	3	38.9	18	104	62	75	7806	061	7806		20.43	MBD	6	Positive	Positive	Negative	5
M	23	3	40.1	15	156	82	134	7806	7242	7806	7242	12.68	Admission	1
M	13	3	39.1	20	137	89	119	7824				1.22	MBD	2
M	23	3	39	20	124	81	113	7806	061	061	7806	2.17	MBD	1	Positive
F	67	2	39	20	124	81	113	4111	4111	78550	4111	7.92	MBD	1
M	33	3	36.9	20	133	86	117	061	061	2765	5589	1.65	MBD	1
M	72	3	38.7	20	129	88	89	7806	061	7806	061	5.92	MBD	1
M	25	3	37.5	18	110	63	75	061	061	061	7806	64.48	Admission	7	Negative	Negative	Negative
M	33	3	38	18	127	78	92	7806	7806	061	4878	1.53	MBD	1	Negative	Negative	Negative
M	47	3	38.2	20	138	81	88	061	7806			1.72	MBD	1
F	43	3	36.7	20	132	87	78	061	061	7821	061	25.88	MBD	2
M	9	4	37.7	22	133	91	115	061	061	061		2.62	MBD	3	Positive	Positive	Negative
M	40	4	37.5	18	110	80	99	061	061	7806		1.93	MBD	2
F	75	3	37.4	20	149	95	87	78701	78701	78900	7806	46.42	MBD	0	Negative	Negative	Negative
M	35	3	38.3	20	124	68	75	7806	7806	061	7806	7.28	MBD	1	Positive	Negative	Negative	8
M	38	4	38.3	20	124	68	75	061	061			1.18	MBD	1
M	72	3	36.8	18	131	88	62	43401	43401	25000	4019	4.7	MBD	0
F	56	3	37.7	18	126	84	81	7806	4019	7806	4019	24.77	MBD	1	Positive	Positive	Positive
F	83	3	37.9	20	149	70	70	7806	7242	7242	7806	2.2	MBD	3
F	51	3	39.3	22	120	70	82	7806	7806	2875	061	17.38	MBD	1	Positive	Negative	Negative	7
M	63	3	36.6	20	125	92	81	7806	061	061	7806	3.15	MBD	5	Positive	Positive	Positive	3
M	10	3	37.9	20	100	57	112	7806	7806	061	7806	5.13	MBD	2	Positive	Negative	Negative	6
F	35	3	38.7	20	124	70	116	7806	7806	061	061	3.12	MBD	2	Positive	Negative	Negative	6
F	21	3	39	18	107	72	125	7806	7806	5990	7806	7.87	AAD	2
M	79	3	37.3	18	104	68	105	7806	7806	061	061	24.2	MBD	2	Positive	Negative	Negative	7
M	50	3	36.9	18	134	99	91	061				1.7	MBD	1	Positive	Positive	Negative	6
M	72	3	38.1	18	111	72	102	7806	061	7806	061	44.3	Transfer	1
M	22	3	38.3	20	114	67	107	7806	061	061	7806	1.8	MBD	1
F	2	3	37.5	26	98	57	127	061				2.15	MBD	4	Positive	Positive	Negative	4
F	15	3	36.8	18	108	75	90	5589	5589	2765	5589	40.83	MBD	0	Negative	Negative	Negative
M	22	3	39.2	20	118	78	121	7806	78701	7806	78701	3.23	MBD	2
F	36	3	38.7	18	100	63	117	7806	7806	061	061	2.53	Admission	1	Negative	Positive	Negative
F	35	4	37.2	18	129	89	90	061				3.23	MBD	1	Negative	Negative	Negative
M	58	3	38.1	24	111	70	105	7806	061	7806		2.53	MBD	2	Positive	Negative	Negative	7
M	48	3	38.4	20	125	70	84	7806	7806	41401	7806	5.05	MBD	4
M	39	3	38.1	20	153	98	111	7806	7806	061	061	2.42	MBD	3
M	45	3	38.9	20	137	77	103	7806	061	7806		2.58	MBD	1
M	60	3	36.9	20	156	84	90	7840	061	7840	061	1.12	MBD	0	Positive	Negative	Negative	7
M	31	3	39.2	20	113	64	135	7806	7806	061	061	6.92	MBD	1	Negative	Positive	Positive
F	64	3	38.6	20	182	63	84	061	585	25000	4019	3.82	MBD	1	Positive	Negative	Negative	7
M	34	3	38.6	18	118	78	92	7806	7821	061	7806	3.35	MBD	2	Positive	Negative	Negative	6
F	55	3	38.7	20	151	79	118	061	4019			3.22	MBD	2
F	39	3	38.5	20	105	67	106	7806	7806	2768	2761	5.58	MBD	3	Negative	Negative	Negative
M	34	3	38.9	22	128	91	138	061	5409	061	5409	20.55	Admission	1
F	36	3	37.7	18	155	110	102	7806	061	061	7806	4.52	MBD	2	Positive	Negative	Negative	7
F	38	4	37.2	20	141	107	102	78900	7806	7806	5589	10.55	MBD	1	Negative	Positive	Negative
M	26	3	38.6	20	109	68	91	061	7806			2.77	MBD	2	Positive	Negative	Negative	7
F	61	3	38.6	20	152	75	90	7806	7806	4019	5990	3.33	MBD	1	Positive	Negative	Negative	7
F	74	3	38.6	18	181	79	107	7806	4019	25000	7806	3.75	Transfer	1
F	10	4	37.9	24	101	63	115	061				1.9	MBD	2	Positive	Positive	Negative
F	19	3	38.9	20	131	87	116	7806	061	7806	061	1.78	MBD	1	Negative	Negative	Negative
F	18	3	38.9	20	129	79	125	061	061	061		2.5	MBD	2	Positive	Negative	Negative	7
F	13	4	38.2	30	121	64	140	462	7821	462	7821	3.47	MBD	3	Negative	Negative	Negative
M	82	3	37.6	20	144	104	82	7806	061	7806	061	6.12	MBD	7	Positive	Positive	Negative	6
F	37	3	38	20	98	66	86	061	061			2.47	MBD	7	Positive	Negative	Negative	5
M	68	3	40.3	20	121	72	99	7806	7806	78550	7806	19.82	Transfer	1	Positive	Negative	Negative	7
F	13	4	37.5	20	109	75	98	061	061	2875	061	1.78	MBD	1	Negative	Negative	Negative
M	74	3	39	20	146	83	92	061	061	7806	2875	3.47	MBD	3
M	18	4	36.8	20	112	73	71	061	061			1.62	MBD	0		Positive	Negative
F	53	3	38.7	20	111	71	98	7806	061	7806		1.6	MBD	1	Positive	Positive	Positive
M	38	3	38.9	20	130	85	107	7806	7806	061	4878	4.7	MBD	1	Negative	Negative	Negative	6
F	41	3	37.8	20	94	58	74	7806	061	061	7806	2	MBD	1	Positive	Positive	Positive
F	39	3	38.3	20	124	84	121	061	7806	061	7806	1.67	MBD	1	Positive	Negative	Negative	7
M	18	3	39	20	137	94	94	061	7806	061	78900	3.73	MBD	2	Positive	Negative	Negative	6
M	56	3	36.4	18	94	58	88	7806	7821	061	7806	2.98	MBD	5	Positive	Positive	Positive
M	17	4	37.3	16	142	94	84	462	061			3.35	MBD	3	Positive	Negative	Negative
F	46	3	37.6	20	109	76	87	061	061	061	5789	15.55	Transfer	4	Positive	Positive	Positive
F	49	4	36.4	20	137	88	77	7806	78701	061	061	2.75	MBD	0
F	46	3	38.8	20	130	77	101	7806	061	061	7806	2.78	MBD	1
M	46	3	38.5	16	119	70	83	7806	7863	78701	061	4.62	MBD	2	Positive	Negative	Negative	7
M	26	4	37.5	18	136	89	84	061				1.68	MBD	0
F	67	3	37.4	16	176	101	87	7806	78900	7840	4019	19.38	MBD	0	Positive	Negative	Negative	7
M	27	3	39.4	20	117	72	116	061	7806			1.87	MBD	1	Negative	Negative	Negative
F	16	3	39.4	24	113	74	130	7840	462	7840	462	15.47	Admission	1	Positive	Negative	Negative
M	25	3	37.9	20	149	90	98	7806	7806	061	061	4.2	MBD	0	Negative	Positive	Negative
M	16	4	38.2	20	120	66	92	061				1.53	MBD	2
F	53	3	39.6	20	166	121	115	7806	061	061	7806	2.68	MBD	1
M	41	3	39.6	20	135	87	100	7806	061	7806	061	19.85	MBD	1
F	37	3	38.6	20	123	75	89	7806	78701	7806	78701	2.5	MBD	1	Positive	Negative	Negative	6
M	57	3	38	20	154	108	131	7806	25000	061	7806	2.07	MBD	1
F	32	3	38.9	20	120	81	118	7806	4659	061	7806	2.63	MBD	1
F	29	3	38.4	20	142	90	107	7806	78701	061	7806	2.92	MBD	1	Positive	Negative	Negative	5
M	18	3	38.9	20	136	67	136	78650	061	78650	061	3.73	MBD	1	Positive	Negative	Negative
M	28	3	38.5	20	126	88	103	061				2.03	MBD	3	Positive	Negative	Negative	5
F	40	3	38.5	20	126	88	103	061	061			1.87	MBD	3	Positive	Negative	Negative	5
M	29	3	37.6	20	106	71	90	4659	7806	4659	7806	4.13	MBD	0	Positive	Negative	Negative	6
M	52	3	37.3	20	122	81	63	5789	061	5789	061	5.25	MBD	3	Positive	Negative	Negative	4
F	30	3	39	24	127	83	131	061	7806	061	061	2.92	MBD	1	Positive	Negative	Negative	6
M	32	4	37.9	18	123	80	89	061	7806			2.22	MBD	1	Negative	Negative	Negative	5
F	20	3	38.1	20	135	101	117	7806	061	7806	061	4.93	MBD	1	Positive	Negative	Negative	5
F	38	3	38.6	20	125	80	113	061	7806	061	7806	3.2	MBD	1	Positive	Negative	Negative	7
F	41	4	37.4	18	99	65	69	7806	061	7806		17.37	MBD	2	Positive	Positive	Negative	5
M	54	3	38.2	20	132	85	101	061	7806			2.95	MBD	6	Negative	Negative	Negative	3
M	44	3	37	18	125	88	76	5589	5589	061		12.58	MBD	0
F	29	3	39.8	20	139	87	135	7806	061	061	7806	2.58	MBD	1	Positive	Negative	Negative	7
M	22	3	39.1	20	154	107	131	061				2.32	MBD	1	Negative	Negative	Negative
M	76	2	38.8	20	151	89	95	7806	41401	5990	4019	25.75	Admission	1	Positive	Negative	Negative	4
M	60	4	36.9	18	130	79	76	061				2.4	MBD	3	Positive	Negative	Negative	7
F	48	4	36.6	18	128	91	96	061				3.87	MBD	1	Positive	Positive	Negative	5
F	61	3	38.5	20	124	78	86	7806	061	7806		3.5	MBD	1	Positive	Negative	Negative	7
M	33	3	37.1	20	135	97	71	061	061	061		2.22	MBD	6	Positive	Positive	Negative
F	51	3	39.1	20	145	88	90	7806	7806	061	7806	3.63	MBD	6	Positive	Negative	Negative	4
M	25	3	36.4	20	167	102	92	061	7806			3.12	MBD	1	Negative	Negative	Negative
M	37	3	38.2	20	136	90	118	7806	061	7806		3.35	MBD	1
F	24	3	37.9	18	121	84	89	061	7806	061	7806	2.02	MBD	2	Negative	Negative	Negative
F	32	3	38.5	20	143	95	123	7806	061	061	7806	2.23	MBD	1	Negative	Negative	Negative
F	36	3	38	18	90	57	80	4659	061	4659	4659	1.68	MBD	2
F	25	3	37.3	20	152	105	99	061	7806	061	7806	2.68	MBD	3	Positive	Negative	Negative	7
F	26	3	37.6	18	118	85	90	7806	7806	061	4878	3.62	MBD	1	Positive	Negative	Negative	5
F	58	3	38.5	18	151	91	124	7806	061	061	7806	3.35	MBD	1	Positive	Negative	Negative	7
F	30	3	38.1	18	114	70	90	061				1.97	MBD	2	Negative	Negative	Negative
F	40	3	37.7	20	138	99	90	7806	7821	061	7821	2.23	MBD	1	Positive	Positive	Positive
M	64	3	38	20	153	91	82	061	7806	061	7806	1.92	MBD	1	Positive	Negative	Negative	8
M	38	3	36.1	20	144	93	80	061	7821	061	7821	2.32	MBD	0	Negative	Negative	Negative
F	27	4	37.1	19	116	80	78	7806	78701	7806	78701	2.3	MBD	5	Positive	Positive	Negative	4
M	17	3	40	20	133	75	125	061	061			1.97	MBD	1	Positive	Negative	Negative
M	66	3	38.1	18	123	67	103	7806	7806	061	061	2.75	MBD	2	Positive	Negative	Negative	5
F	70	3	37.9	18	147	91	69	7806	41401	25000	7806	3.05	MBD	2	Positive	Negative	Negative	6
M	19	3	38.9	18	120	70	105	7806	061	7806	061	2.73	MBD	2	Positive	Negative	Negative	7
F	8	3	39.6	24	120	81	136	061	061	462		1.67	MBD	3	Negative	Negative	Negative
M	38	3	39	20	148	88	97	7806	7806	061	7806	12.12	Admission	1	Negative	Negative	Negative
F	20	3	37.8	20	105	64	80	5589	5589	7806		4.13	MBD	1
F	28	3	40.4	20	148	89	112	7806	061	7806	061	2.23	MBD	2	Positive	Negative	Negative	7
F	39	3	38	18	121	70	81	7806	061	7806	061	2.77	MBD	1	Positive	Positive	Negative	9
M	26	3	39.5	20	135	83	140	061	7806	061	7806	2.67	MBD	1	Positive	Negative	Negative	8
F	13	3	37.2	24	91	45	133	7821				3.13	MBD	3	Negative	Negative	Negative
F	7	3	39.1	20	105	64	133	463	5589	463	5589	7.45	MBD	3
M	30	3	38.4	20	122	67	90	4659	061	7806		1.95	MBD	1	Positive	Negative	Negative	5
F	29	3	39.1	20	129	78	127	5212	7806	061	7806	4.37	MBD	1	Positive	Negative	Negative	7
M	16	4	37.7	20	114	61	97	061	061	061	061	2.85	MBD	1	Positive	Negative	Negative
F	34	3	39.4	20	125	73	130	7806	061	061	5997	2.92	MBD	1	Positive	Negative	Negative	5
M	46	4	37.5	20	127	87	69	061				6.5	MBD	5	Positive	Positive	Negative
F	35	3	38.3	20	108	65	97	7806	061	7806	061	3.9	MBD	1	Positive	Negative	Negative	5
M	61	3	38.1	20	140	84	110	7806	061	7821	061	2.83	MBD	1	Positive	Positive	Negative
M	62	3	39.5	18	110	68	102	7080	7806	7080	061	6.38	MBD	4	Negative	Negative	Negative
M	54	3	38	20	134	86	115	061	7806	061	7806	2.38	MBD	3	Positive	Negative	Negative	7
M	43	3	38.2	20	152	106	93	061	7806	061	7806	28.82	AAD	4	Positive	Negative	Negative	5
M	68	3	37.8	20	104	64	76	7806	061	7806	061	31.85	AAD	0	Positive	Negative	Negative	7
F	74	3	37.1	20	128	75	87	7806	7806	061	7806	11.68	Admission	1	Positive	Negative	Negative	6
M	22	3	39	20	145	88	111	7806	061	061	7806	2.93	MBD	1	Positive	Negative	Negative	8
M	27	3	39.4	20	139	79	129	061	7806	061	7806	2.17	MBD	1	Positive	Negative	Negative	7
F	39	3	38.5	20	122	80	102	7806	061	061	7806	1.72	MBD	1	Positive	Negative	Negative	6
M	32	4	36.3	20	123	71	67	7806	061	7806		2.23	MBD	1	Positive	Positive	Negative
F	30	4	36.8	20	117	83	91	7806	0579	061	7806	3.33	MBD	4	Positive	Positive	Negative	7
F	63	3	38.2	18	138	81	76	7806	53081	061	7806	3.1	MBD	1	Positive	Negative	Negative	7
M	41	3	36	18	158	100	75	061	061	7847		4.75	MBD	0	Positive	Positive	Negative
M	31	3	38.6	17	129	93	118	4659	061			0.48	MBD	1
F	16	4	37.9	20	121	79	98	462	462	061	061	3.27	MBD	2	Positive	Negative	Negative
M	52	3	37.4	20	129	96	101	7830	78701	061	78701	2.93	MBD	2	Positive	Negative	Negative	6
F	25	4	37.3	20	139	103	105	061	7806	061	7806	3.28	MBD	4	Negative	Negative	Negative
M	23	3	39.2	18	120	77	130	7806	7806	061	061	1.98	MBD	1	Positive	Negative	Negative
F	14	4	37.1	18	120	83	97	061	061	7821	2875	2.6	Admission	3	Positive	Positive	Positive
M	53	3	37.2	18	126	98	116	7806	7806	7806	2875	24.87	MBD	0	Positive	Positive	Positive
M	24	3	38.1	18	134	81	110	7806	061	7806	061	2.32	MBD	1	Positive	Negative	Negative
M	11	3	39.9	18	125	82	102	462	061	061	462	2.13	MBD	1	Positive	Negative	Negative
F	27	3	39	20	120	83	133	7806	061	061	7806	2.83	MBD	1	Positive	Negative	Negative
M	13	3	39.5	20	132	81	133	462	462			5.02	MBD	2	Positive
F	75	4	37.3	20	122	83	92	7840	061	7840	2875	27.2	Admission	0	Positive	Negative	Negative
M	67	3	38.5	18	139	72	106	7806	486	061	25000	3.68	MBD	2	Positive	Negative	Negative
F	55	4	37.5	20	118	85	72	061	061	061		4.45	MBD	0	Positive	Negative	Negative
F	28	3	39.3	18	108	74	113	061				2.87	MBD	1	Positive	Negative	Negative
F	44	3	38.5	20	135	98	92	061	061	7806		20.13	Transfer	3	Positive	Negative	Negative
F	34	3	39.4	20	162	84	97	061				1.73	MBD	1	Positive
M	27	3	38.5	20	131	84	117	7806	7806	7806	061	2.78	MBD	1	Positive	Negative	Negative
F	24	3	39.6	20	122	76	135	7806	061	061	7806	2.7	MBD	1	Positive	Negative	Negative
F	19	3	39.7	20	147	92	125	5589	061	7806	78900	2.63	MBD	1	Positive
F	17	3	38.9	20	119	68	111	462				2.5	MBD	1	Positive	Negative	Negative
M	30	3	38.1	18	126	75	104	7806	7806	78550	7806	3.05	MBD	2	Positive	Negative	Negative
M	3	3	38.1	18	126	75	104	462	7821			2.95	MBD	2	Positive	Positive	Negative
M	60	2	36.9	20	134	84	105	25000	25000	25000	25020	17.17	Admission	0	Negative	Positive	Negative
F	30	3	38.6	20	116	78	111	7806	061	7806	061	2.53	MBD	1	Positive	Negative	Negative
F	38	3	38	18	122	85	126	7806	7806	061	061	1.72	MBD	2	Positive	Negative	Negative
F	30	3	39.3	18	140	84	110	7806	7840	061	061	1.67	MBD	1	Positive	Negative	Negative
M	59	3	39.2	18	159	99	98	061	7806	4019		2.23	MBD	1	Positive	Negative	Negative
F	46	3	38.3	18	114	73	80	061	7806	061	7806	1.52	MBD	2	Positive	Negative	Negative
F	62	3	36.4	20	176	96	63	7806	78701	061	7806	5.02	MBD	3	Positive	Negative	Negative
M	60	4	37.7	18	127	95	125	7806	7806	061	061	2.42	MBD	3	Positive	Negative	Negative
M	26	4	36.8	20	127	93	73	061				3.3	MBD	4	Positive	Positive	Negative
F	27	3	37.4	81	112	78	58	061	7806			3.4	MBD	0	Positive	Negative	Negative
F	12	3	38.5	20	100	51	121	7806	061			2.88	MBD	1	Positive
M	80	4	36.7	18	128	79	77	4019	061			2.42	MBD	3	Positive	Negative	Negative
F	48	3	39.4	20	138	88	105	7806	061	061	7806	4.65	MBD	1	Positive	Negative	Negative
F	27	3	38.7	20	120	82	100	7806	061	7806		3.25	MBD	1	Positive	Negative	Negative
M	77	3	38.7	20	120	82	100	7863	061	2875		5.42	Admission	1	Positive	Positive	Positive
M	15	3	40.1	20	137	81	104	061	061	53500	2765	6.33	MBD	1
M	30	3	38.9	17	136	93	111	7806	7806	061	7806	3.4	MBD	2	Positive	Negative	Negative
M	33	3	38.9	20	138	86	129	061				3.38	MBD	1	Positive	Negative	Negative
M	35	3	40.2	20	131	79	103	061				3.9	MBD	1	Positive	Negative	Negative
F	30	3	38.1	20	136	83	93	7806	061	7806	6238	1.97	MBD	1	Positive	Negative	Negative
M	67	3	36.5	20	160	134	71	5789	5789	061	4019	4.87	Admission	4	Positive	Negative	Positive
M	66	3	38.5	20	145	95	111	7806	7806	25000	4019	2.02	MBD	2	Positive	Negative	Negative
F	79	3	35.8	20	108	74	87	95901	95901	25000	4019	4.4	Transfer	0	Positive	Negative	Positive
F	22	3	39.3	18	113	76	116	7806	061			2.48	MBD	1	Positive	Negative	Negative
M	74	3	38.9	18	160	75	111	4019	7806	4019	061	4.23	MBD	1	Positive	Negative	Negative
M	18	3	37.3	20	125	79	84	7806	4659	061	7806	3.45	MBD	1	Positive	Negative	Negative
M	73	3	37.3	18	110	73	63	78900	7806	5789	78900	3.93	MBD	2	Positive	Negative	Negative
M	60	3	38.7	20	124	75	90	7806	061	061	7806	2.93	MBD	1	Positive	Negative	Negative
M	16	4	37.2	18	122	80	73	061	061			3.38	MBD	4
F	14	3	39.2	19	103	64	82	061				5.83	MBD	2	Positive	Positive	Positive
M	61	3	38.7	16	158	89	95	7806	061	4019	7806	4.18	MBD	1	Positive	Negative	Negative
F	62	4	36.7	20	175	107	93	061				2.25	MBD	7	Positive	Positive	Positive
M	36	3	39.5	18	135	84	127	7806	061	7806	061	2.05	MBD	1	Positive	Negative	Negative
M	59	3	38.8	18	156	92	92	7806	7806	061	7806	2.07	MBD	1	Positive	Negative	Negative
M	34	3	39.7	19	101	65	128	061	7806	061	7806	1.77	MBD	1	Positive	Negative	Negative
M	32	3	38.4	20	139	94	128	7806	061	061	7806	1.93	MBD	1	Positive	Negative	Negative
M	27	4	36.9	16	113	77	58	7806	061	061	7806	2.18	MBD	3	Positive	Negative	Negative
F	53	3	39.1	19	102	55	113	061	6829	061	6829	8.53	MBD	1	Positive	Negative	Negative
M	42	3	39.3	20	129	89	122	061	061	2869	061	4.48	MBD	1	Positive	Negative	Negative
M	46	3	39.6	20	121	90	126	061	061	061	7806	22.68	MBD	2	Positive	Negative	Negative
M	12	3	38.8	20	114	81	117	462	462	061		2.87	MBD	1	Positive	Negative	Negative
F	18	4	38.6	20	110	73	103	462	061	462	061	2.03	MBD	3	Positive	Negative	Negative
F	28	3	38.3	18	109	74	128	061	7806			2.8	MBD	1	Positive	Negative	Negative
F	66	3	38.6	24	165	91	105	061	7806	7840		5.05	MBD	2	Positive	Negative	Negative
F	35	3	38.3	18	131	85	111	061	7806			2.8	MBD	1	Positive	Negative	Negative
M	71	4	36.6	20	173	112	93	7863	7863	061		6.13	MBD	0	Positive	Negative	Negative
F	27	3	38.3	20	122	81	116	7806	061			2.72	MBD	2	Positive	Negative	Negative
M	75	3	39.8	24	139	68	120	7806	061	7806		3.3	MBD	2	Positive	Negative	Negative
F	26	3	38.3	18	131	81	116	061				2.27	MBD	1	Positive	Negative	Negative
F	36	3	38.3	18	131	81	116	7806	061	7806		2.83	MBD	1	Positive	Negative	Negative
M	35	3	38.4	18	144	95	104	7806	061	7806		2.15	MBD	1	Positive	Negative	Negative
M	21	3	38.4	18	144	95	104	7806	061	7806		2.4	MBD	1	Positive	Negative	Negative
F	70	3	38.4	18	142	66	86	7806	061	25000	7806	2.87	MBD	1	Positive	Negative	Negative
M	32	3	39.3	24	122	74	118	7806	061	25000	7806	2.5	MBD	2	Positive	Negative	Negative
M	49	3	39.6	24	161	93	150	7806	061	25000	7806	2.55	MBD	1	Positive	Negative	Negative
M	50	3	38.3	20	142	107	118	7806	061	7806	061	3.05	MBD	2	Negative	Negative	Negative
F	32	4	37.1	16	93	55	63	7806	061	061	7806	2.23	MBD	2	Positive	Negative	Negative
M	19	4	36.9	16	111	76	73	7806	7840	7806	7840	2.2	MBD	2	Positive	Positive	Positive
M	34	4	37.8	20	130	88	90	7806	5589	7806	5589	2.17	MBD	3	Positive	Negative	Negative
F	37	3	38.9	20	124	83	138	5990	5990	5990	7806	7.92	MBD	3	Positive	Negative	Negative
M	13	3	40.2	20	137	80	111	462				2.48	MBD	2	Positive	Negative	Negative
M	42	4	39.4	16	113	74	90	061				3.75	MBD	2	Positive	Negative	Negative
M	50	4	39.2	20	183	123	116	061	061	2875		3.25	MBD	2	Positive	Negative	Negative
F	59	3	39.3	20	153	88	117	061	061	5990	2875	3.25	MBD	1	Positive	Negative	Negative
M	50	4	39.4	16	118	71	95	7806	7806	061	061	1.6	MBD	1	Positive	Positive	Negative
M	19	3	38.9	20	138	74	116	061	061	061		1.73	MBD	1	Positive	Negative	Negative
F	63	3	38.7	20	201	117	138	7806	7806	061	061	1.65	MBD	1	Positive	Positive	Negative
M	32	3	38.8	20	107	70	102	7806	061	7806		18.88	MBD	2	Positive	Negative	Negative
M	50	3	39.8	18	141	86	127	7806	061	061	7806	3.22	MBD	1
F	65	4	37.7	18	127	79	89	061	061			3.2	MBD	1	Positive	Negative	Negative
M	2	3	37.8	22	106	79	140	485	485	061		2.53	Admission	5		Negative	Negative
F	22	3	39	20	120	45	104	7806	061	061	7806	2.83	MBD	1	Positive	Negative	Negative
M	12	3	39.6	20	116	60	113	061				4.37	MBD	2
M	20	3	39.2	20	116	71	113	061	7806	061	7806	1.88	MBD	1	Positive	Negative	Negative
F	54	4	38	20	92	52	75	7806	061	7806		2.48	MBD	1	Positive	Positive	Positive
M	34	3	39	20	106	59	113	061	7806			5.52	MBD	1	Positive	Negative	Negative
M	66	3	38.6	20	145	89	111	7806	061	7806		2.3	MBD	1	Positive	Negative	Negative
F	65	3	38.2	20	147	89	95	7806	061	7806		2.25	MBD	1	Positive	Negative	Negative
M	65	3	38	20	148	86	79	7806	061	7806		2.18	MBD	3	Positive	Negative	Negative
M	23	3	38.2	20	141	88	89	7806	78900	7806	78900	1.82	MBD	1	Positive	Negative	Negative
M	52	3	38.8	20	124	89	83	7806	061	7806		1.88	MBD	1	Positive	Negative	Negative
F	34	3	38.6	20	108	68	91	7806	061	061		3.48	MBD	2	Positive	Negative	Negative
M	52	4	36.8	18	133	86	62	061	2875			3.55	MBD	4	Positive	Negative	Negative
F	68	4	37.5	18	147	79	100	7840	7242	061	7840	5.27	MBD	2	Positive	Negative	Negative
F	60	3	38.4	18	129	83	101	061	061			2.85	MBD	1	Positive	Negative	Negative
F	52	3	38.9	20	112	68	94	463	7806	061	463	1.2	MBD	2	Positive	Negative	Negative
F	29	3	38.4	22	117	57	133	7806	061	7806		1.5	MBD	1	Positive	Negative	Negative
M	35	3	38.6	20	178	105	125	061	061			1.72	MBD	1	Positive	Negative	Negative
F	61	4	36.9	18	130	86	86	7806	78900	061	061	1.73	MBD	0	Positive	Positive	Positive
M	34	3	38.2	20	147	97	86	7806	061	7806		1.52	MBD	4	Positive	Negative	Negative
M	20	3	38.9	20	147	83	113	7806	061	061	7806	1.32	MBD	1	Positive	Negative	Negative
F	89	3	38.4	20	124	64	92	7806	7806	061	7806	9.03	Admission	2	Positive	Negative	Negative
F	46	3	38.5	20	197	117	75	7806	061	7806	061	3.77	MBD	4	Positive	Negative	Negative
F	74	3	36.6	18	104	65	71	7806	061	7804	4019	5.5	AAD	0	Positive	Negative	Negative
M	66	3	38.2	20	183	100	94	7806	061	061	7806	2.47	MBD	2	Positive	Negative	Negative
M	29	3	38.2	20	106	68	97	7806	7806	78900	061	1.78	AAD	2	Negative	Negative	Negative
M	66	3	39.5	20	172	102	137	7806	061	061	7806	2.58	MBD	2	Positive	Negative	Negative
M	30	3	38.1	18	118	79	91	061	061			1.42	MBD	2	Positive	Negative	Negative
F	67	3	39.7	19	161	72	109	7806	061	061	7806	1.38	MBD	2	Positive	Negative	Negative
F	62	3	39.2	16	133	79	102	7806	061	7806	061	2.22	MBD	1	Positive	Negative	Negative
M	25	3	39.4	19	125	85	121	061	7806	061	7806	1.57	MBD	1	Positive	Negative	Negative
F	73	3	39.1	18	143	71	107	061	7806	25000	4019	19.67	Admission	1	Negative	Negative	Negative
M	30	3	39.3	19	117	69	102	7806	061	5990	061	1.43	MBD	2	Positive	Negative	Negative
F	25	4	37.4	18	122	84	74	061	7806	5589	061	2.55	MBD	4	Positive	Positive	Negative
M	64	3	37.4	18	122	84	74	7806	486	061	061	2.17	MBD	4	Positive	Negative	Negative
M	56	3	38.8	19	162	85	87	7806	061	4019	061	2.78	MBD	1	Positive	Negative	Negative
M	30	3	38.7	20	140	91	104	061	7806	061	7806	1.88	MBD	1	Positive	Positive	Negative
M	81	3	39	20	138	90	95	7806	061	7806	061		MBD	1	Positive	Negative	Negative
M	74	3	36.2	24	168	82	102	5733	5849	78701	78701	2.6	Admission	0	Positive	Negative	Positive
F	60	4	37.3	18	138	97	90	061	061	78701	061	8.4	MBD	2	Positive	Negative	Negative
M	23	4	37.1	18	120	77	88	061				2.78	Transfer	5	Positive	Negative	Negative
M	18	3	39.9	18	110	60	90	462	061	462		2.33	MBD	1	Positive
M	19	3	38.4	20	126	80	104	061				1.48	MBD	1	Positive	Negative	Negative
F	80	3	36.7	20	146	85	103	061	061	5589		4.27	AAD	1	Positive	Positive	Positive
M	19	4	37.3	18	138	93	91	6929	6929	061		2.07	MBD	0	Positive	Negative	Negative
M	34	3	39.1	20	130	85	129	7806	061	061	7806	1.22	MBD	1	Positive	Negative	Negative
M	54	4	37	20	144	93	78	061				1.9	MBD	0	Positive	Positive	Positive
F	64	3	39.4	24	167	93	129	061				1.98	MBD	1	Positive	Negative	Negative
M	57	3	37	24	113	83	106	061				3.33	MBD	2	Positive	Negative	Negative
F	79	3	39.3	20	144	81	105	7806	7806	78650	7806		MBD	1	Positive	Negative	Negative
